# Supplementary material
Source: publisher figshare collection journal article supplement (https://acs.figshare.com/ndownloader/files/5067109)

***Highly Stereoselective  $\text{TiCl}_4$ -Catalyzed Evans-Aldol and  
 $\text{Et}_3\text{Al}$ -Mediated Reformatsky Reactions.  
Efficient Accesses to Optically Active syn- or anti-  
 $\alpha$ -Trifluoromethyl- $\beta$ -hydroxy Carboxylic Acid Derivatives***

Taichi Shimada, Masamitsu Yoshioka, Tsutomu Konno,  
and Takashi Ishihara\*

*Department of Chemistry and Materials Technology, Kyoto Institute of Technology,  
Matsugasaki, Sakyo-ku, Kyoto 606-8585, Japan*

[\*ishihara@kit.ac.jp\*](mailto:ishihara@kit.ac.jp)

***SUPPORTING INFORMATION***

# CONTENTS

|                                                                                                                         |            |
|-------------------------------------------------------------------------------------------------------------------------|------------|
| <b>I. General Experimental</b>                                                                                          | <b>S3</b>  |
| <b>II. Synthetic Chemistry</b>                                                                                          |            |
| (4 <i>S</i> )-Benzyl-3-(3,3,3-trifluoro-propanoyl)-oxazolidin-2-one ( <b>3</b> )                                        | <b>S4</b>  |
| (4 <i>S</i> )-Benzyl-3-(2-bromo-3,3,3-trifluoro-propanoyl)-oxazolidin-2-one ( <b>4</b> )                                | <b>S4</b>  |
| General procedure for synthesis of $\alpha$ -trifluoromethyl- $\beta$ -hydroxyimides <b>1</b> by <i>syn</i> -selective  |            |
| Evans-aldol reaction                                                                                                    | <b>S5</b>  |
| General procedure for synthesis of $\alpha$ -trifluoromethyl- $\beta$ -hydroxyimides <b>1</b> by <i>anti</i> -selective |            |
| Reformatsky reaction                                                                                                    | <b>S5</b>  |
| (4 <i>S</i> )-Benzyl-3-[3-hydroxy-3-phenyl-2-(trifluoromethyl)propanoyl]-oxazolidin-2-one ( <b>1a</b> )                 | <b>S6</b>  |
| (4 <i>S</i> )-Benzyl-3-[3-hydroxy-3-(4-methylphenyl)-2-(trifluoromethyl)propanoyl]-oxazolidin-2-one ( <b>1b</b> )       | <b>S6</b>  |
| (4 <i>S</i> )-Benzyl-3-[3-hydroxy-3-(4-methoxyphenyl)-2-(trifluoromethyl)propanoyl]-oxazolidin-2-one ( <b>1c</b> )      | <b>S7</b>  |
| (4 <i>S</i> )-Benzyl-3-[3-(4-chloro-phenyl)-3-hydroxy-2-(trifluoromethyl)propanoyl]-oxazolidin-2-one ( <b>1d</b> )      | <b>S7</b>  |
| (4 <i>S</i> )-Benzyl-3-[3-(4-fluoro-phenyl)-3-hydroxy-2-(trifluoromethyl)propanoyl]-oxazolidin-2-one ( <b>1e</b> )      | <b>S8</b>  |
| (4 <i>S</i> )-Benzyl-3-[3-hydroxy-2-(trifluoromethyl)hexanoyl]-oxazolidin-2-one ( <b>1f</b> )                           | <b>S8</b>  |
| (4 <i>S</i> )-Benzyl-3-[3-hydroxy-4-methyl-2-(trifluoromethyl)pentanoyl]-oxazolidin-2-one ( <b>1g</b> )                 | <b>S9</b>  |
| (4 <i>S</i> )-Benzyl-3-[3-hydroxy-2-(trifluoromethyl)hex-4-enoyl]-oxazolidin-2-one ( <b>1h</b> )                        | <b>S9</b>  |
| <b>III. <sup>1</sup>H and <sup>13</sup>C NMR spectra</b>                                                                |            |
| (4 <i>S</i> )-Benzyl-3-(3,3,3-trifluoro-propanoyl)-oxazolidin-2-one ( <b>3</b> )                                        | <b>S10</b> |
| (4 <i>S</i> )-Benzyl-3-(2-bromo-3,3,3-trifluoro-propanoyl)-oxazolidin-2-one ( <b>4</b> )                                | <b>S11</b> |
| (4 <i>S</i> )-Benzyl-3-[3-hydroxy-3-phenyl-2-(trifluoromethyl)propanoyl]-oxazolidin-2-one ( <b>1a</b> )                 | <b>S12</b> |
| (4 <i>S</i> )-Benzyl-3-[3-hydroxy-3-(4-methylphenyl)-2-(trifluoromethyl)propanoyl]-oxazolidin-2-one ( <b>1b</b> )       | <b>S14</b> |
| (4 <i>S</i> )-Benzyl-3-[3-hydroxy-3-(4-methoxyphenyl)-2-(trifluoromethyl)propanoyl]-oxazolidin-2-one ( <b>1c</b> )      | <b>S16</b> |
| (4 <i>S</i> )-Benzyl-3-[3-(4-chloro-phenyl)-3-hydroxy-2-(trifluoromethyl)propanoyl]-oxazolidin-2-one ( <b>1d</b> )      | <b>S18</b> |
| (4 <i>S</i> )-Benzyl-3-[3-(4-fluoro-phenyl)-3-hydroxy-2-(trifluoromethyl)propanoyl]-oxazolidin-2-one ( <b>1e</b> )      | <b>S20</b> |
| (4 <i>S</i> )-Benzyl-3-[3-hydroxy-2-(trifluoromethyl)hexanoyl]-oxazolidin-2-one ( <b>1f</b> )                           | <b>S21</b> |
| (4 <i>S</i> )-Benzyl-3-[3-hydroxy-4-methyl-2-(trifluoromethyl)pentanoyl]-oxazolidin-2-one ( <b>1g</b> )                 | <b>S23</b> |
| (4 <i>S</i> )-Benzyl-3-[3-hydroxy-2-(trifluoromethyl)hex-4-enoyl]-oxazolidin-2-one ( <b>1h</b> )                        | <b>S25</b> |
| <b>IV. ORTEP drawing</b>                                                                                                |            |
| non-Evans <i>syn</i> ( <b>1a</b> )                                                                                      | <b>S27</b> |
| Evans <i>anti</i> ( <b>1c</b> )                                                                                         | <b>S27</b> |

## I. General Experimental

Infrared spectra (IR) were recorded on a Shimadzu FTIR-8200A (PC) spectrophotometer.  $^1\text{H}$  NMR spectra were measured with a Bruker DRX 500 (500.13 MHz) in a chloroform-*d* ( $\text{CDCl}_3$ ) solution using tetramethylsilane ( $\text{Me}_4\text{Si}$ ) as internal standard.  $^{13}\text{C}$  NMR spectra were measured with a Bruker DRX (125.75 MHz) in a ( $\text{CDCl}_3$ ) solution with chloroform ( $\text{CHCl}_3$ ) as internal reference.  $^{19}\text{F}$  NMR spectra were measured with JEOR JNM-EX 90A (84.10 MHz) and ECA 500 (470.62 MHz) in a  $\text{CDCl}_3$  solution. Trichlorofluoromethane ( $\text{CFCl}_3$ ) was used as an internal standard for  $^{19}\text{F}$  NMR. All reactions were routinely monitored by  $^{19}\text{F}$  NMR spectroscopy or TLC. High resolution mass spectra (HRMS) were taken on a JEOL JMS-700 mass spectrometer by FAB method.

Anhydrous tetrahydrofuran (THF) was purchased from Wako Chemical Co. and used without any purification. Dichloromethane ( $\text{CH}_2\text{Cl}_2$ ) was distilled over calcium hydride. All chemicals were of reagent grade and, if necessary, were purified in the usual manner prior to use. Thin layer chromatography (TLC) was done with Merck silica gel 60  $\text{F}_{254}$  plates, and column chromatography was carried out with Wako gel C-200. All reactions were carried out under an atmosphere of argon.

## II. Synthetic Chemistry

### Preparation of (4S)-Benzyl-3-(3,3,3-trifluoro-propanoyl)-oxazolidin-2-one (3)

To a dry three-necked flask under argon was added a solution of 3,3,3-trifluoropropanoic acid (2.561 g, 20.0 mmol) in THF (100 mL). To the mixture was added trimethylacetyl chloride (*t*-BuCOCl, 2.653 g, 22.0 mmol) and triethylamine (Et<sub>3</sub>N, 2.226 g, 22.0 mmol) at -78 °C. The reaction was allowed to stir at -78 °C for 15-min prior to warming to -15 °C and stirring for 45-min. Then the solution was cooled to -78 °C, 40.0 mmol of lithiated oxazolidinone was added. After stirring at 0 °C for 1 h, the reaction was quenched with saturated aqueous ammonium chloride (40 mL). The bulk of the THF was removed on a rotary evaporator at a bath temperature of 30 °C, and the resulting mixture was extracted with ethyl acetate (40 mL x 2), saturated sodium hydrogencarbonate (40 mL). Combined extracts were dried over anhydrous sodium sulfate, filtered, concentrated under reduced pressure. The resulting residue was purified by silica gel column chromatography (hexane/ethyl acetate = 3/1) to afford pure product **3** (0.293 g, 10.2 mmol, 51 % yield).

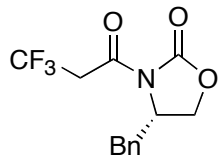 IR (neat) 1790, 1715, 1454, 1410, 1393, 1244, 1144 cm<sup>-1</sup>; <sup>1</sup>H NMR (CDCl<sub>3</sub>) δ = 2.81 (dd, *J* = 9.6, 13.4 Hz, 1H), 3.32 (dd, *J* = 3.2, 13.4 Hz, 1H), 3.81 – 3.98 (m, 1H), 4.23 – 4.29 (m, 2H), 4.69 – 4.45 (m, 1H), 7.20 (d, *J* = 7.3 Hz, 2H), 7.27 – 7.37 (m, 3H); <sup>13</sup>C NMR (CDCl<sub>3</sub>) δ = 37.5, 39.7 (q, *J* = 29.9 Hz), 55.2, 66.6, 123.5 (q, *J* = 276.6 Hz), 127.6, 129.1, 129.4, 134.6, 153.1, 163.3 (q, *J* = 3.4 Hz); <sup>19</sup>F NMR (CDCl<sub>3</sub>) δ = -63.3 (t, *J* = 9.0 Hz, 3F); HRMS (FAB<sup>+</sup>) Found: *m/z* 288.0849, Calcd for (M+H) C<sub>13</sub>H<sub>13</sub>F<sub>3</sub>NO<sub>3</sub>: 288.0848.

### Preparation of (4S)-Benzyl-3-(2-bromo-3,3,3-trifluoro-propanoyl)-oxazolidin-2-one (4)

Under an argon atmosphere, to a solution of imide **1** (0.287 g, 1.00 mmol) in CH<sub>2</sub>Cl<sub>2</sub> (5.0 mL) was gradually added trimethylsilyltrifluoromethanesulfonate (TMSOTf, 0.333 g, 1.50 mmol) at -20 °C. To the mixture was added triethylamine (Et<sub>3</sub>N, 0.152 g 1.50 mmol). After stirring at the reflux temperature for 0.5 h, the solution was cooled -78 °C, then a solution of bromine (0.208 g, 1.30 mmol) in CH<sub>2</sub>Cl<sub>2</sub> (8.0 mL) was added. After stirring at that temperature for 0.5 h, the reaction was quenched with ice water (20 mL). The mixture was extracted with CH<sub>2</sub>Cl<sub>2</sub> (20 mL x 4), and the extracts were washed with saturated aqueous sodium sulfite (20 mL) and brine (20 mL). The combined extracts were dried over anhydrous sodium sulfate, filtered, and concentrated under reduced pressure. The resulting residue was purified by silica gel column chromatography (hexane/ethyl acetate = 3/1) to afford pure product **4** (0.297 g, 0.811 mmol, 81 % yield).

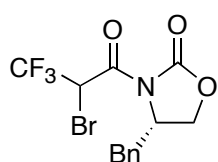

IR (neat) 3011, 1771, 1705, 1456, 995, 874, 760  $\text{cm}^{-1}$ ;  $^1\text{H}$  NMR ( $\text{CDCl}_3$ )  $\delta$  = 2.84 (dd,  $J$  = 9.4, 13.9 Hz, 1H, for one isomer), 2.87 (dd,  $J$  = 9.4, 14.6 Hz, 1H, for another isomer), 3.30 (dd,  $J$  = 2.1, 13.5 Hz, 1H), 4.26 – 4.35 (m, 1H), 4.70 – 4.76 (m, 1H, for one isomer), 4.75 – 4.76 (m, 1H, for another isomer), 6.17 (q,  $J$  = 6.3 Hz, 1H, for one isomer), 6.21 (q,  $J$  = 6.3 Hz, 1H, for another isomer), 7.18 – 7.37 (m, 5H);  $^{13}\text{C}$  NMR ( $\text{CDCl}_3$ )  $\delta$  = 36.8 (for one isomer), 37.4 (for another isomer), 37.1 (q,  $J$  = 34.7 Hz, for one isomer), 37.3 (q,  $J$  = 34.5 Hz, for another isomer), 55.2 (for one isomer), 55.7 (for another isomer), 66.5 (for one isomer), 66.6 (for another isomer), 121.9 (q,  $J$  = 278.3 Hz, for one isomer), 121.9 (q,  $J$  = 278.7 Hz, for another isomer), 127.7 (for another isomer), 127.7 (for another isomer), 129.1, 129.3, 129.4, 134.1 (for another isomer), 134.2 (for another isomer), 152.3, 162.1;  $^{19}\text{F}$  NMR ( $\text{CDCl}_3$ )  $\delta$  = -68.6 (d,  $J$  = 4.4 Hz, 3F); HRMS (FAB $^+$ ) Found:  $m/z$  365.9954, Calcd for ( $\text{M}+\text{H}$ )  $\text{C}_{13}\text{H}_{12}\text{BrF}_3\text{NO}_3$ : 365.9953.

### General procedure for synthesis of $\alpha$ -trifluoromethyl- $\beta$ -hydroxyimides **1** by *syn*-selective Evans-aldol reaction

To a dried three-necked flask was added imide **3** (0.287 g, 1.00 mmol) in  $\text{CH}_2\text{Cl}_2$  (5.0 mL) under argon. To the mixture were added trimethylsilyltrifluoromethanesulfonate (TMSOTf, 0.333 g, 1.50 mmol) and triethylamine ( $\text{Et}_3\text{N}$ , 0.152 g, 1.50 mmol) at  $-20^\circ\text{C}$ . After stirring at reflux temperature for 0.5 h, the solution was cooled to  $0^\circ\text{C}$ . Then benzaldehyde (0.127 g, 1.20 mmol) and titanium tetrachloride (0.057 g, 0.3 mmol) were added to it. After stirring at that temperature for 4 h, the solution was poured into cooled water. The mixture was extracted with  $\text{CH}_2\text{Cl}_2$  (20 mL x 4). The combined extracts were dried over anhydrous sodium sulfate, filtered, and concentrated under reduced pressure. The resulting residue was purified by silica gel column chromatography (benzene/ethyl acetate = 95/5) to afford pure product **1a** (0.248 g, 0.63 mmol, 63 % yield).

### General procedure for synthesis of $\alpha$ -trifluoromethyl- $\beta$ -hydroxyimides **1** by *anti*-selective Reformatsky reaction

To a suspension of zinc (0.078 g, 1.20 mmol) and benzaldehyde (0.053 g, 0.5 mmol) in THF (2 mL) and triethylaluminum in hexane solution (0.53 mL) was added a solution of (4*S*)-benzyl-3-(2-bromo-3,3,3-trifluoro-propanoyl)-oxazolidin-2-one **4** (0.366 g, 1.0 mmol) in THF (1 mL) at  $-40^\circ\text{C}$  under an argon atmosphere. After stirring at the same temperature for 3 h, the reaction was quenched with saturated aqueous ammonium chloride (25 mL) and acidified by the addition of 1N hydrochloric acid solution. The resulting mixture was extracted with ethyl acetate (25 mL x 3). The organic layers were dried over anhydrous  $\text{Na}_2\text{SO}_4$  and concentrated under reduced pressure. The residue was purified by silica-gel column chromatography (benzene/ethyl acetate 95/5) to afford pure product **1a** (0.169 g, 0.430 mmol, 86%).

**(4S)-Benzyl-3-[3-hydroxy-3-phenyl-2-(trifluoromethyl)propanoyl]-oxazolidin-2-one (1a)**

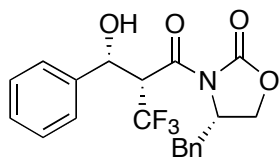

**syn-(2R,3S)** : IR (KBr) 1778, 1763, 1705, 1682, 1369, 1161, 700, 681  $\text{cm}^{-1}$ ;  $^1\text{H}$  NMR ( $\text{CDCl}_3$ )  $\delta$  = 1.80 (dd,  $J$  = 10.1, 13.5 Hz, 1H), 2.44 (d,  $J$  = 3.7 Hz, 1H), 2.57 (dd,  $J$  = 3.3, 13.5 Hz, 1H), 3.95 (dd,  $J$  = 2.7, 9.2 Hz, 1H), 4.07 (dd,  $J$  = 8.2, 9.2 Hz, 1H), 4.49 – 4.55 (m, 1H), 5.39 (dd,  $J$  = 3.7, 9.1

Hz, 1H), 5.66 (dq,  $J$  = 9.1, 7.7 Hz, 1H), 6.91 – 6.93 (m, 2H), 7.20 – 7.28 (m, 3H), 7.31 – 7.40 (m, 3H), 7.47 – 7.49 (m, 2H);  $^{13}\text{C}$  NMR ( $\text{CDCl}_3$ )  $\delta$  = 36.6, 53.2 (q,  $J$  = 25.5 Hz), 54.9, 65.7, 72.8 (q,  $J$  = 1.3 Hz), 124.1 (q,  $J$  = 281.8 Hz), 127.4, 127.6, 128.8, 129.0, 129.1, 129.2, 134.7, 139.1, 152.6, 164.9 (q,  $J$  = 3.1 Hz);  $^{19}\text{F}$  NMR ( $\text{CDCl}_3$ )  $\delta$  = -63.4 (d,  $J$  = 7.7 Hz, 3F); HRMS ( $\text{FAB}^+$ ) Found:  $m/z$  394.1266, Calcd for ( $\text{M}+\text{H}$ )  $\text{C}_{20}\text{H}_{19}\text{F}_3\text{NO}_4$ : 394.1266.

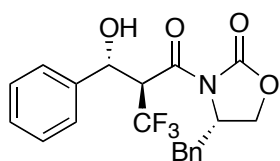

**anti-(2S,3S)** : IR (KBr) 3499, 1786, 1709, 1456, 1391, 1211, 1078, 955  $\text{cm}^{-1}$ ;  $^1\text{H}$  NMR ( $\text{CDCl}_3$ )  $\delta$  = 2.79 (br, 1H), 2.79 (dd,  $J$  = 9.5 Hz, 13.5 Hz, 1H), 3.30 (dd,  $J$  = 3.4, 13.5 Hz, 1H), 4.06 (dd,  $J$  = 8.5, 8.5 Hz, 1H), 4.16 (dd,  $J$  = 2.7, 9.0 Hz, 1H), 4.64 – 4.69 (m, 1H), 5.31 (d,  $J$  = 7.4 Hz, 1H), 5.55 (dq,  $J$  = 7.8, 7.8 Hz, 1H), 7.20 – 7.21 (m, 2H), 7.27 – 7.34 (m, 3H),

7.35 – 7.40 (m, 3H), 7.42 – 7.44 (m, 2H);  $^{13}\text{C}$  NMR ( $\text{CDCl}_3$ )  $\delta$  = 37.6, 53.7 (q,  $J$  = 25.4 Hz), 55.4, 66.1, 72.0 (q,  $J$  = 1.6 Hz), 123.3 (q,  $J$  = 281.3 Hz), 126.4, 127.5, 128.7, 128.8, 129.0, 129.3, 134.6, 139.7, 153.1, 166.3 (q,  $J$  = 2.5 Hz);  $^{19}\text{F}$  NMR ( $\text{CDCl}_3$ )  $\delta$  = -63.88 (d,  $J$  = 8.5 Hz, 3F); HRMS ( $\text{FAB}^+$ ) Found:  $m/z$  394.1267, Calcd for ( $\text{M}+\text{H}$ )  $\text{C}_{20}\text{H}_{19}\text{F}_3\text{NO}_4$ : 394.1266.

**(4S)-Benzyl-3-[3-hydroxy-3-(4-methylphenyl)-2-(trifluoromethyl)propanoyl]-oxazolidin-2-one (1b)**

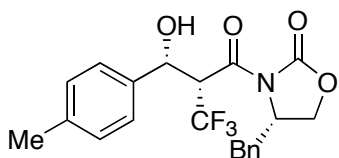

**syn-(2R,3S)** : IR (KBr) 3452, 1780, 1684, 1163, 1113, 1001, 754  $\text{cm}^{-1}$ ;  $^1\text{H}$  NMR ( $\text{CDCl}_3$ )  $\delta$  = 1.84 (dd,  $J$  = 9.8, 13.6 Hz, 1H), 2.30 (s, 3H), 2.45 (br s, 1H), 2.59 (dd,  $J$  = 3.3, 13.6 Hz, 1H), 3.95 (dd,  $J$  = 2.6, 9.2 Hz, 1H), 4.05 – 4.09 (m, 1H), 4.51 – 4.57 (m, 1H), 5.35 (d,  $J$  = 9.3 Hz, 1H), 5.55

– 5.65 (m, 1H), 6.88 – 6.90 (m, 2H), 7.17 – 7.38 (m, 7H);  $^{13}\text{C}$  NMR ( $\text{CDCl}_3$ )  $\delta$  = 21.1, 36.6, 53.1 (q,  $J$  = 25.4 Hz), 54.8, 65.6, 72.6 (q,  $J$  = 1.5 Hz), 124.1 (q,  $J$  = 282.1 Hz), 127.4, 127.5, 128.9, 129.1, 129.4, 134.7, 136.2, 139.1, 152.6, 165.0 (q,  $J$  = 3.3 Hz);  $^{19}\text{F}$  NMR ( $\text{CDCl}_3$ )  $\delta$  = -63.6 (d,  $J$  = 6.6 Hz, 3F); HRMS ( $\text{FAB}^+$ ) Found:  $m/z$  407.1346, Calcd for ( $\text{M}+$ )  $\text{C}_{21}\text{H}_{20}\text{F}_3\text{NO}_4$ : 407.1344.

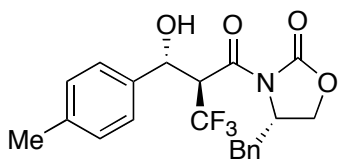

**anti-(2S,3S)** : m.p. 42 – 44  $^{\circ}\text{C}$ ; IR (KBr) 3445, 2924, 1786, 1456, 1393, 1254, 1111, 1032  $\text{cm}^{-1}$ ;  $^1\text{H}$  NMR ( $\text{CDCl}_3$ )  $\delta$  = 2.35 (s, 3H), 2.68 (br s, 1H), 2.79 (dd,  $J$  = 9.5, 13.5 Hz, 1H), 3.30 (dd,  $J$  = 2.8, 9.1 Hz, 1H), 4.65 – 4.71 (m, 1H), 5.26 (d,  $J$  = 7.7 Hz, 1H), 5.54 (dq,  $J$  = 7.9, 7.9 Hz, 1H),

7.18 – 7.21 (m, 4H), 7.29 – 7.35 (m, 5H);  $^{13}\text{C}$  NMR (125.75 MHz,  $\text{CDCl}_3$ , TMS)  $\delta$  = 21.1, 37.6, 52.8 (q,  $J$  = 25.2 Hz), 55.4, 66.1, 72.0, 123.4 (q,  $J$  = 281.1 Hz), 126.4, 127.4, 129.0, 129.4, 129.4, 134.7, 136.8, 138.7, 153.2, 166.4 (q,  $J$  = 2.6 Hz);  $^{19}\text{F}$  NMR ( $\text{CDCl}_3$ )  $\delta$  = -63.8 (d,  $J$  = 8.5 Hz, 3F); HRMS ( $\text{FAB}^+$ ) Found:  $m/z$  407.1349, Calcd for ( $\text{M}+$ )  $\text{C}_{21}\text{H}_{20}\text{F}_3\text{NO}_4$ : 407.1344.

**(4S)-Benzyl-3-[3-hydroxy-3-(4-methoxyphenyl)-2-(trifluoromethyl)propanoyl]-oxazolidin-2-one (1c)**

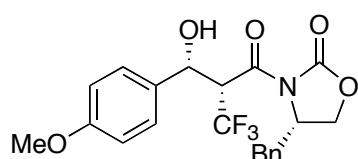

**syn-(2R,3S)** : IR (KBr) 3449, 2927, 1778, 1682, 1377, 1362, 1250  $\text{cm}^{-1}$ ;  $^1\text{H}$  NMR ( $\text{CDCl}_3$ )  $\delta$  = 1.89 (dd,  $J$  = 10.0, 13.6 Hz, 1H), 2.41 (br s, 1H), 2.63 (dd,  $J$  = 3.3, 13.6 Hz, 1H), 3.75 (s, 1H), 3.96 (dd  $J$  = 2.7, 9.2 Hz, 1H), 4.08 (dd  $J$  = 8.2, 9.2 Hz, 1H), 4.52 – 4.58 (m, 1H), 5.34 (d,  $J$  = 9.4 Hz, 1H), 5.60 (dd  $J$  = 9.0, 7.9 Hz, 1H), 6.87 – 6.93 (m, 2H), 7.22 – 7.42 (m, 7H);  $^{13}\text{C}$  NMR ( $\text{CDCl}_3$ )  $\delta$  = 27.0, 36.7, 53.2 (q,  $J$  = 25.5 Hz), 54.9, 55.3, 65.7, 72.4 (q,  $J$  = 1.4 Hz), 114.1, 124.1 (q,  $J$  = 281.9 Hz), 127.4, 128.9, 121.0, 129.1, 131.2, 134.7, 152.6, 160.2;  $^{19}\text{F}$  NMR ( $\text{CDCl}_3$ )  $\delta$  = -63.7 (d,  $J$  = 8.8 Hz, 3F); HRMS ( $\text{FAB}^+$ ) Found:  $m/z$  423.1294, Calcd for ( $\text{M}+\text{H}$ )  $\text{C}_{21}\text{H}_{21}\text{F}_3\text{NO}_5$ : 423.1294.

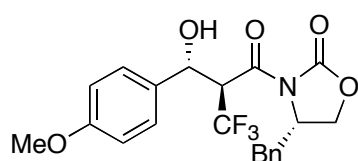

**anti-(2S,3S)** : m.p. 114 - 116  $^{\circ}\text{C}$ ; IR (KBr) 3531, 2926, 1782, 1713, 1516, 1352, 1254, 1161  $\text{cm}^{-1}$ ;  $^1\text{H}$  NMR ( $\text{CDCl}_3$ )  $\delta$  = 2.61 (br s, 1H), 2.80 (dd,  $J$  = 9.5, 13.5 Hz, 1H), 3.80 (s, 3H), 4.13 (dd,  $J$  = 8.4, 8.4 Hz, 1H), 4.17 (dd,  $J$  = 2.9, 9.0 Hz, 1H), 4.69 – 4.73 (m, 1H), 5.24 (d,  $J$  = 8.1 Hz, 1H), 5.52 (dq,  $J$  = 8.0, 8.0 Hz, 1H), 6.89 – 6.92 (m, 2H), 7.20 – 7.21 (m, 2H), 7.27 – 7.36 (m, 5H);  $^{13}\text{C}$  NMR ( $\text{CDCl}_3$ )  $\delta$  = 37.7, 52.9 (q,  $J$  = 25.0 Hz), 55.3, 55.4, 66.1, 71.8 (q,  $J$  = 1.5 Hz), 114.1, 123.4 (q,  $J$  = 281.6 Hz), 127.5, 127.8, 129.0, 129.4, 131.8, 134.7, 153.2, 160.0, 166.5 (q,  $J$  = 2.7 Hz);  $^{19}\text{F}$  NMR ( $\text{CDCl}_3$ )  $\delta$  = -63.8 (d,  $J$  = 8.2 Hz, 3F); HRMS ( $\text{FAB}^+$ ) Found:  $m/z$  423.1302, Calcd for ( $\text{M}+\text{H}$ )  $\text{C}_{21}\text{H}_{21}\text{F}_3\text{NO}_5$ : 423.1294.

**(4S)-Benzyl-3-[3-(4-chloro-phenyl)-3-hydroxy-2-(trifluoromethyl)propanoyl]-oxazolidin-2-one (1d)**

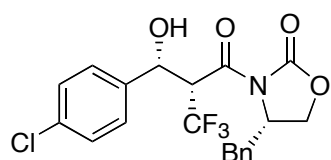

**syn-(2R,3S)** : IR (KBr) 3443, 1778, 1682, 1194, 1165, 822, 702  $\text{cm}^{-1}$ ;  $^1\text{H}$  NMR ( $\text{CDCl}_3$ )  $\delta$  = 2.79 (dd,  $J$  = 9.5, 13.5 Hz, 1H), 3.23 (d,  $J$  = 5.5 Hz, 1H), 3.28 (dd,  $J$  = 3.2, 13.5 Hz, 1H), 4.12 (dd  $J$  = 8.0, 9.1 Hz, 1H), 4.17 (dd  $J$  = 2.9, 9.1 Hz, 1H), 4.65 – 4.73 (m, 1H), 5.25 – 5.28 (m, 1H), 5.49 – 5.56 (m, 1H), 7.18 – 7.21 (m, 2H), 7.26 – 7.38 (m, 7H);  $^{13}\text{C}$  NMR ( $\text{CDCl}_3$ )  $\delta$  = 21.1, 36.6, 53.1 (q,  $J$  = 25.4 Hz), 37.5, 52.7 (q,  $J$  = 25.3 Hz), 66.1, 71.3 (q,  $J$  = 1.3 Hz), 123.2 (q,  $J$  = 281.1 Hz), 127.5, 128.0, 128.3, 128.9, 129.0, 129.3, 134.6 (q,  $J$  = 13.5 Hz), 138.3, 153.12, 166.1 (q,  $J$  = 2.6 Hz);  $^{19}\text{F}$  NMR (84.10 MHz,  $\text{CDCl}_3$ ,  $\text{CFCI}_3$ )  $\delta$  = -63.6 (d,  $J$  = 6.6 Hz, 3F); HRMS ( $\text{FAB}^+$ ) Found:  $m/z$  428.0880, Calcd for ( $\text{M}+\text{H}$ )  $\text{C}_{20}\text{H}_{18}\text{ClF}_3\text{NO}_4$ : 428.0876.

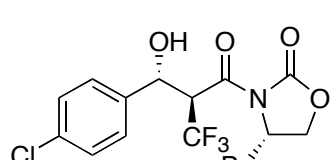

**anti-(2S,3S)** : IR (neat) 3468, 2924, 1784, 1391, 1352, 1252, 1211, 1169, 1015  $\text{cm}^{-1}$ ;  $^1\text{H}$  NMR ( $\text{CDCl}_3$ )  $\delta$  = 2.78 (dd,  $J$  = 9.5, 13.5 Hz, 1H), 3.29 (dd,  $J$  = 3.4, 13.5 Hz, 1H), 4.12 (dd,  $J$  = 8.5, 8.5 Hz, 1H), 4.18 (dd,  $J$  = 3.0, 9.1 Hz, 1H), 4.67 – 4.71 (m, 1H), 5.27 (d,  $J$  = 7.9 Hz, 1H), 5.52 (dq,  $J$  = 7.9, 7.9 Hz, 1H), 7.19 – 7.20 (m, 2H), 7.27 – 7.30 (m, 2H), 7.32 – 7.34 (m, 2H), 7.35 – 7.38 (m, 3H);  $^{13}\text{C}$  NMR ( $\text{CDCl}_3$ )  $\delta$  = 37.6, 52.7 (q,  $J$  = 25.4 Hz), 55.4, 66.2, 71.4 (q,  $J$  = 1.5 Hz), 123.2 (q,  $J$  = 280.9 Hz), 127.5, 127.9, 129.0, 129.0, 139.3, 134.5, 134.7, 138.3, 153.2, 166.2 (q,  $J$  = 2.6 Hz);  $^{19}\text{F}$  NMR ( $\text{CDCl}_3$ )  $\delta$  = -63.7 (d,  $J$  = 8.8 Hz, 3F); HRMS ( $\text{FAB}^+$ ) Found:  $m/z$  427.0804,

Calcd for (M<sup>+</sup>) C<sub>20</sub>H<sub>17</sub>ClF<sub>3</sub>NO<sub>4</sub>: 427.0798.

**(4S)-Benzyl-3-[3-(4-fluoro-phenyl)-3-hydroxy-2-(trifluoromethyl)propanoyl]-oxazolidin-2-one (1e)**

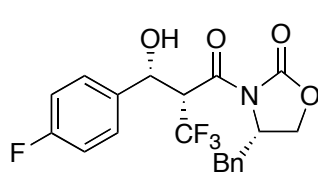*syn*-(**2R,3S**) : IR (KBr) 3485, 1784, 1607, 1393, 1227, 1161 cm<sup>-1</sup>; <sup>1</sup>H NMR (CDCl<sub>3</sub>) δ = 1.95 (dd, *J* = 10.0, 13.5 Hz, 1H), 2.57 (br s, 1H), 2.68 (dd, *J* = 3.2, 13.5 Hz, 1H), 4.00 (dd, *J* = 1.7, 9.2 Hz, 1H), 4.09 (dd, *J* = 0.8, 9.2 Hz, 1H), 4.53 – 4.58 (m, 1H), 5.38 (d, *J* = 4.6 Hz, 1H), 5.57 (dq, *J* = 0.8, 8.8 Hz, 1H), 6.94 – 6.96 (m, 2H), 7.06 (t, *J* = 8.6 Hz, 2H), 7.22 – 7.30 (m, 3H); <sup>13</sup>C NMR (CDCl<sub>3</sub>) δ = 36.8, 53.2 (q, *J* = 25.4 Hz), 55.0, 65.8, 72.0 (d, *J* = 1.3 Hz), 115.7 (d, *J* = 21.8 Hz), 124.0 (q, *J* = 281.8 Hz), 127.5, 129.0, 129.1, 129.4 (d, *J* = 8.2 Hz), 134.5, 135.0 (d, *J* = 2.6 Hz), 152.6, 163.0 (d, *J* = 248.6 Hz), 165.0 (q, *J* = 3.0 Hz); <sup>19</sup>F NMR (CDCl<sub>3</sub>) δ = -63.5 (d, *J* = 8.8 Hz, 3F), -112.3 – -112.8 (m, 1F); HRMS (FAB<sup>+</sup>) Found: *m/z* 412.1175, Calcd for (M+H) C<sub>20</sub>H<sub>18</sub>F<sub>4</sub>NO<sub>4</sub>: 412.1172.

**(4S)-Benzyl-3-[3-hydroxy-2-(trifluoromethyl)hexanoyl]-oxazolidin-2-one (1f)**

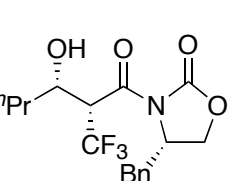*syn*-(**2R,3S**) : IR (neat) 3512, 2963, 1782, 1705, 1388, 1213 cm<sup>-1</sup>; <sup>1</sup>H NMR (CDCl<sub>3</sub>) δ = 0.96 (t, *J* = 7.0 Hz, 3H), 1.40 – 1.47 (m, 1H), 1.53 – 1.69 (m, 3H), 2.35 (br s, 1H), 2.76 (dd, *J* = 9.9, 13.3 Hz, 1H), 3.34 (dd, *J* = 3.3, 13.3 Hz, 1H), 4.20 – 4.30 (m, 3H), 4.75 – 4.80 (m, 1H), 5.00 – 5.08 (m, 1H), 7.22 – 7.40 (m, 5H); <sup>13</sup>C NMR (CDCl<sub>3</sub>) δ = 13.7, 18.8, 36.5, 37.6, 51.9 (q, *J* = 24.6 Hz), 55.5, 66.3, 69.7, 124.2 (q, *J* = 281.7 Hz), 127.5, 129.0, 129.3, 134.6, 153.2, 166.0 (q, *J* = 3.3 Hz); <sup>19</sup>F NMR (CDCl<sub>3</sub>) δ = -62.5 (d, *J* = 8.7 Hz, 3F); HRMS (FAB<sup>+</sup>) Found: *m/z* 360.1430, Calcd for (M+H) C<sub>17</sub>H<sub>21</sub>F<sub>3</sub>NO<sub>4</sub>: 360.1422.

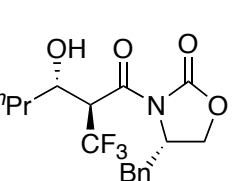*anti*-(**2S,3S**) : IR (neat) 3479, 2964, 1784, 1709, 1391, 1254, 1165 cm<sup>-1</sup>; <sup>1</sup>H NMR (CDCl<sub>3</sub>) δ = 0.96 (t, *J* = 7.3 Hz, 3H), 1.37 – 1.47 (m, 1H), 2.32 (br s, 1H), 2.78 (dd, *J* = 9.5, 13.5 Hz, 1H), 3.32 (dd, *J* = 3.3, 13.5 Hz, 1H), 4.20 (dd, *J* = 3.3, 9.1 Hz, 1H), 4.23 – 4.26 (m, 2H), 4.76 – 4.81 (m, 1H), 5.104 (dq, *J* = 8.1, 8.1 Hz, 1H), 7.20 – 7.22 (m, 2H), 7.28 – 7.30 (m, 1H), 7.32 – 7.35 (m, 2H); <sup>13</sup>C NMR (CDCl<sub>3</sub>) δ = 13.6, 18.2, 37.3, 37.6, 51.9 (q, *J* = 25.3 Hz), 55.4, 66.2, 69.4, 123.8 (q, *J* = 281.1 Hz), 127.5, 129.0, 129.3, 134.7, 153.4, 166.9 (q, *J* = 3.1 Hz); <sup>19</sup>F NMR (CDCl<sub>3</sub>) δ = -64.0 (d, *J* = 8.2 Hz, 3F); HRMS (FAB<sup>+</sup>) Found: *m/z* 360.1424, Calcd for (M+H) C<sub>17</sub>H<sub>21</sub>F<sub>3</sub>NO<sub>4</sub>: 360.1422.



**(4S)-Benzyl-3-[3-hydroxy-4-methyl-2-(trifluoromethyl)pentanoyl]-oxazolidin-2-one (1g)**

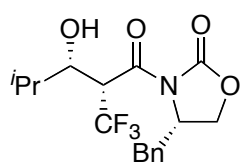

**syn-(2R,3S)** : IR (KBr) 3464, 2970, 2343, 1757, 1705, 1394, 1213  $\text{cm}^{-1}$ ;  $^1\text{H}$  NMR ( $\text{CDCl}_3$ )  $\delta$  = 1.03 (dd,  $J$  = 6.7, 10.6 Hz, 6H), 1.77 – 1.84 (m, 1H), 2.16 (br s, 1H), 2.75 (dd,  $J$  = 9.8, 13.3 Hz, 1H), 3.31 (dd,  $J$  = 3.4, 13.3 Hz, 1H), 4.03 – 4.10 (m, 1H), 4.20 – 4.28 (m, 2H), 4.75 – 4.81 (m, 1H), 5.16 – 5.23 (m, 5H), 7.21 – 7.23 (m, 2H), 7.27 – 7.36 (m, 3H);  $^{13}\text{C}$  NMR ( $\text{CDCl}_3$ )  $\delta$  = 16.7, 19.6, 31.4, 37.8, 49.6 (q,  $J$  = 24.2 Hz), 55.3, 66.3, 74.6, 124.4 (q,  $J$  = 281.9 Hz), 127.6, 129.1, 129.3, 134.6, 152.8, 166.4 (q,  $J$  = 3.4 Hz);  $^{19}\text{F}$  NMR ( $\text{CDCl}_3$ )  $\delta$  = -62.2 (d,  $J$  = 8.7 Hz, 3F); HRMS (FAB<sup>+</sup>) Found:  $m/z$  360.1430, Calcd for (M+H)  $\text{C}_{17}\text{H}_{21}\text{F}_3\text{NO}_4$ : 360.1422.

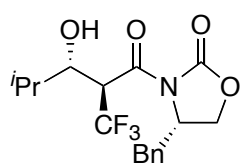

**anti-(2S,3S)** : IR (neat) 3503, 2970, 1786, 1709, 1391, 1352, 1213, 1094  $\text{cm}^{-1}$ ;  $^1\text{H}$  NMR ( $\text{CDCl}_3$ )  $\delta$  = 0.99 (d,  $J$  = 6.7 Hz, 3H), 1.01 (d,  $J$  = 6.7 Hz, 3H), 1.89 – 1.94 (m, 1H), 2.33 (br s, 1H), 2.78 (dd,  $J$  = 9.6, 13.5 Hz, 1H), 3.32 (dd,  $J$  = 3.4, 13.5 Hz, 1H), 4.06 (dd,  $J$  = 4.0, 7.7 Hz, 1H), 4.22 – 4.26 (m, 2H), 4.75 – 4.80 (m, 1H), 5.27 (dq,  $J$  = 8.0, 8.0 Hz, 1H), 7.20 – 7.22 (m, 2H), 7.28 – 7.30 (m, 1H), 7.32 – 7.35 (m, 2H);  $^{13}\text{C}$  NMR ( $\text{CDCl}_3$ )  $\delta$  = 15.1, 19.6, 31.0, 37.5, 49.4 (q,  $J$  = 25.5 Hz), 55.4, 66.2, 74.2, 123.8 (q,  $J$  = 281.2 Hz), 127.5, 129.0, 129.3, 134.7, 153.3, 167.3 (q,  $J$  = 3.5 Hz);  $^{19}\text{F}$  NMR ( $\text{CDCl}_3$ )  $\delta$  = -64.1 (d,  $J$  = 8.8 Hz, 3F); HRMS (FAB<sup>+</sup>) Found:  $m/z$  360.1424, Calcd for (M+H)  $\text{C}_{17}\text{H}_{21}\text{F}_3\text{NO}_4$ : 360.1422.

**(4S)-Benzyl-3-[3-hydroxy-2-(trifluoromethyl)hex-4-enoyl]-oxazolidin-2-one (1h)**

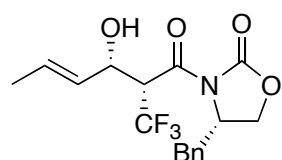

**syn-(2R,3S)** : IR (neat) 3501, 3030, 1778, 1705, 1355, 1256, 1163  $\text{cm}^{-1}$ ;  $^1\text{H}$  NMR ( $\text{CDCl}_3$ )  $\delta$  = 1.72 (dd,  $J$  = 1.4, 6.5 Hz, 3H), 2.22 (br s, 1H), 2.58 (dd,  $J$  = 10.2, 13.3 Hz, 1H), 3.27 (dd,  $J$  = 3.3, 13.3 Hz, 1H), 4.70 – 4.77 (m, 2H), 5.15 – 5.22 (m, 1H), 5.62 (dd,  $J$  = 8.1, 15.3 Hz, 1H), 5.85 (qd,  $J$  = 15.3, 6.6 Hz, 1H), 7.21 – 7.23 (m, 2H), 7.27 – 7.36 (m, 3H);  $^{13}\text{C}$  NMR ( $\text{CDCl}_3$ )  $\delta$  = 17.7, 37.5, 52.1 (q,  $J$  = 25.1 Hz), 55.5, 66.0, 71.4, 123.9 (q,  $J$  = 281.3 Hz), 127.5, 128.7, 129.1, 129.3, 131.6, 134.8, 153.1, 165.2 (q,  $J$  = 2.9 Hz);  $^{19}\text{F}$  NMR ( $\text{CDCl}_3$ )  $\delta$  = -62.2 (d,  $J$  = 8.7 Hz, 3F); HRMS (FAB<sup>+</sup>) Found:  $m/z$  358.1270, Calcd for (M+H)  $\text{C}_{17}\text{H}_{19}\text{F}_3\text{NO}_4$ : 358.1266.

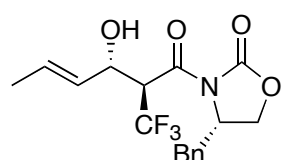

**anti-(2S,3S)** : IR (neat) 3468, 3032, 1786, 1707, 1391, 1354, 1167, 1142  $\text{cm}^{-1}$ ;  $^1\text{H}$  NMR ( $\text{CDCl}_3$ )  $\delta$  = 1.74 (d,  $J$  = 6.5 Hz, 3H), 2.24 (br s, 1H), 2.79 (dd,  $J$  = 9.6, 13.5 Hz, 1H), 3.31 (dd,  $J$  = 3.2, 13.5 Hz, 1H), 4.18 – 4.24 (m, 2H), 4.68 (dd,  $J$  = 7.7, 7.7 Hz, 1H), 4.74 – 4.79 (m, 1H), 5.15 (dq,  $J$  = 8.2, 8.2 Hz, 1H), 5.56 (dd,  $J$  = 7.5, 15.2 Hz, 1H), 5.88 (dq,  $J$  = 6.6, 15.2 Hz, 1H), 7.20 – 7.22 (m, 2H), 7.28 – 7.29 (m, 1H), 7.31 – 7.35 (m, 2H);  $^{13}\text{C}$  NMR ( $\text{CDCl}_3$ )  $\delta$  = 17.6, 37.6, 52.1 (q,  $J$  = 25.0 Hz), 55.4, 66.1, 70.7, 123.4 (q,  $J$  = 280.7 Hz), 127.4, 129.0, 129.4, 129.4, 130.8, 134.7, 153.3, 166.4;  $^{19}\text{F}$  NMR ( $\text{CDCl}_3$ )  $\delta$  = -63.8 (d,  $J$  = 8.7 Hz, 3F); HRMS (FAB<sup>+</sup>) Found:  $m/z$  357.1272, Calcd for (M+H)  $\text{C}_{17}\text{H}_{19}\text{F}_3\text{NO}_4$ : 358.1266.

(4*S*)-Benzyl-3-(3,3,3-trifluoro-propanoyl)-oxazolidin-2-one (**3**)

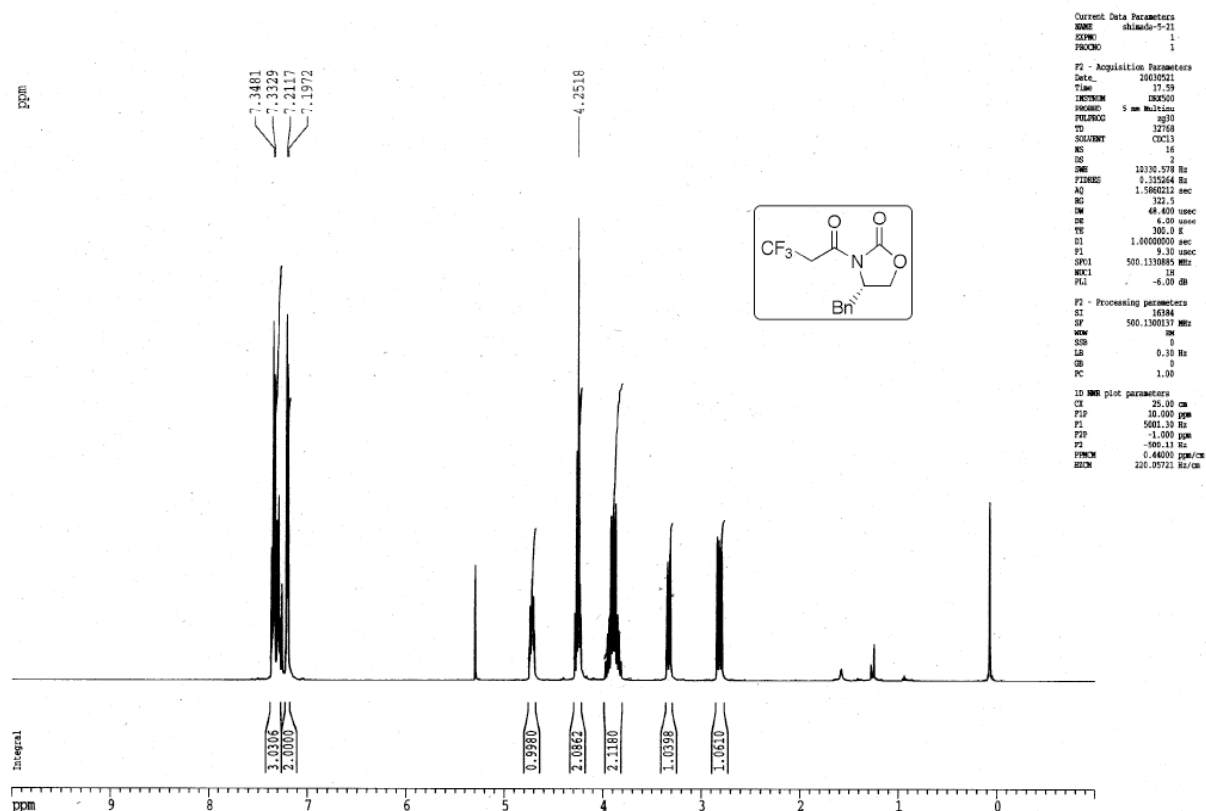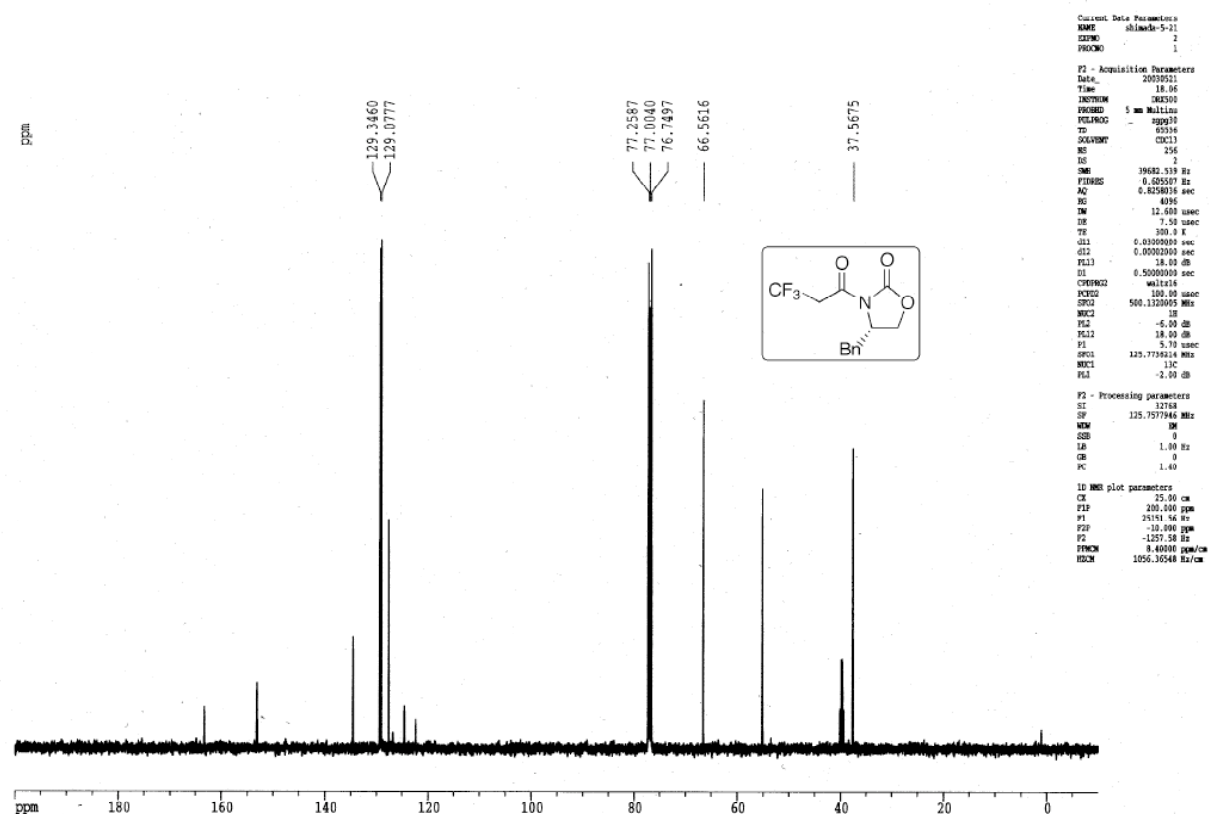

(4S)-Benzyl-3-(2-bromo-3,3,3-trifluoro-propanoyl)-oxazolidin-2-one (4)

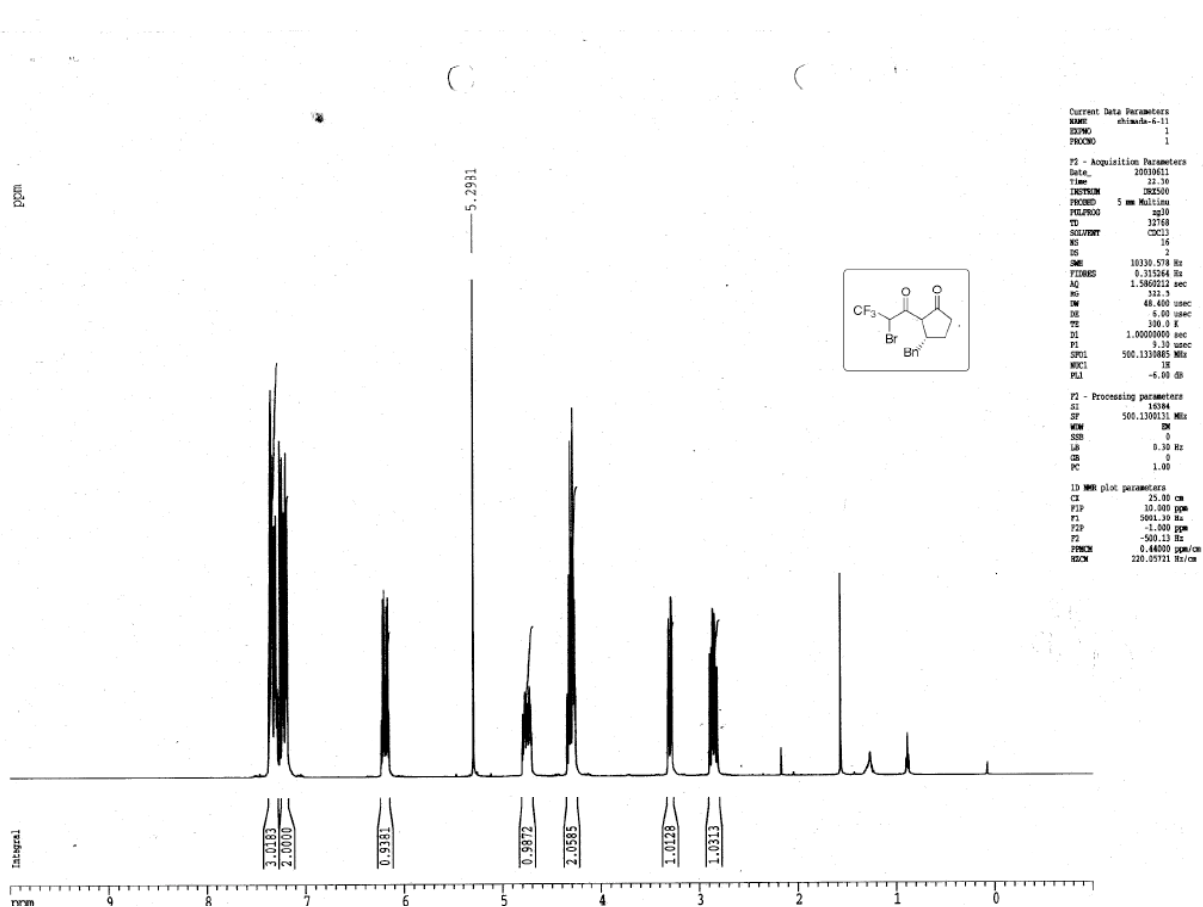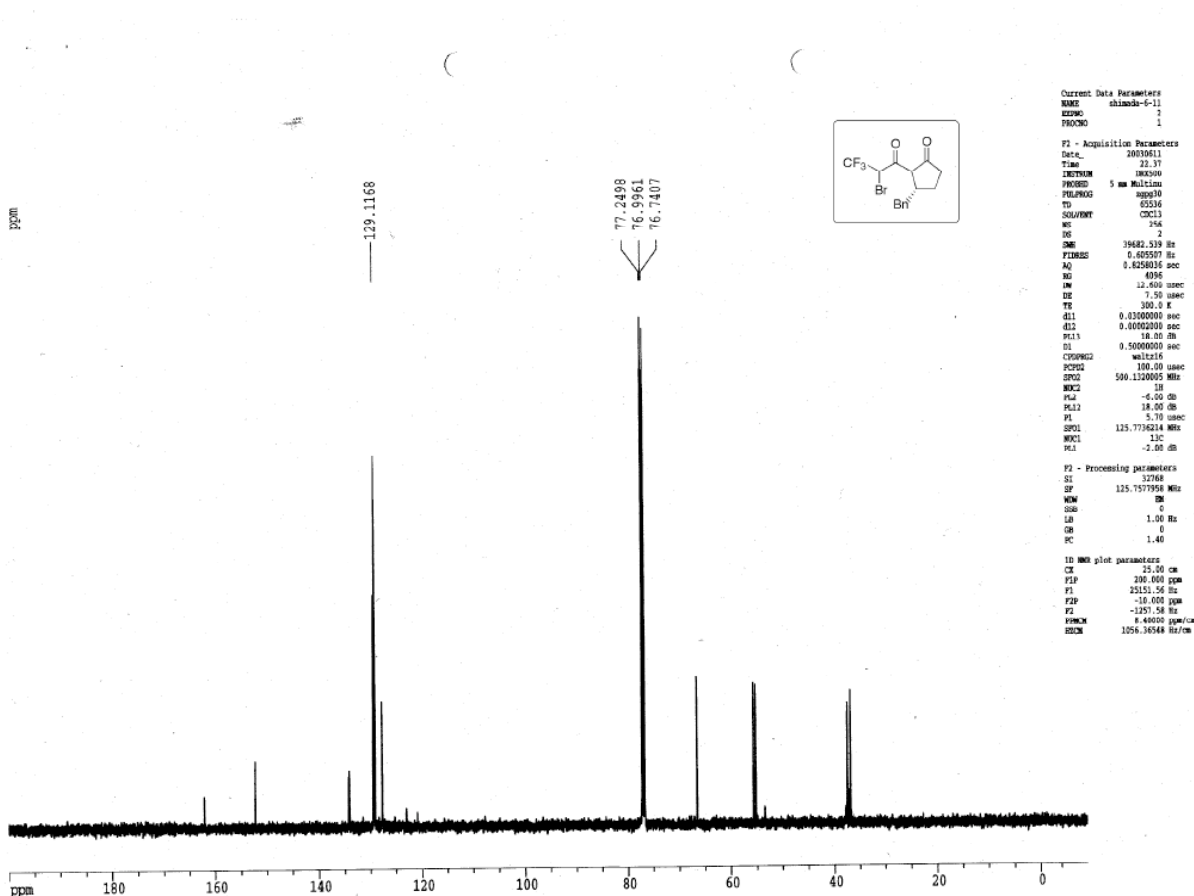

***syn*-(2*R*,3*S*) (1a)**

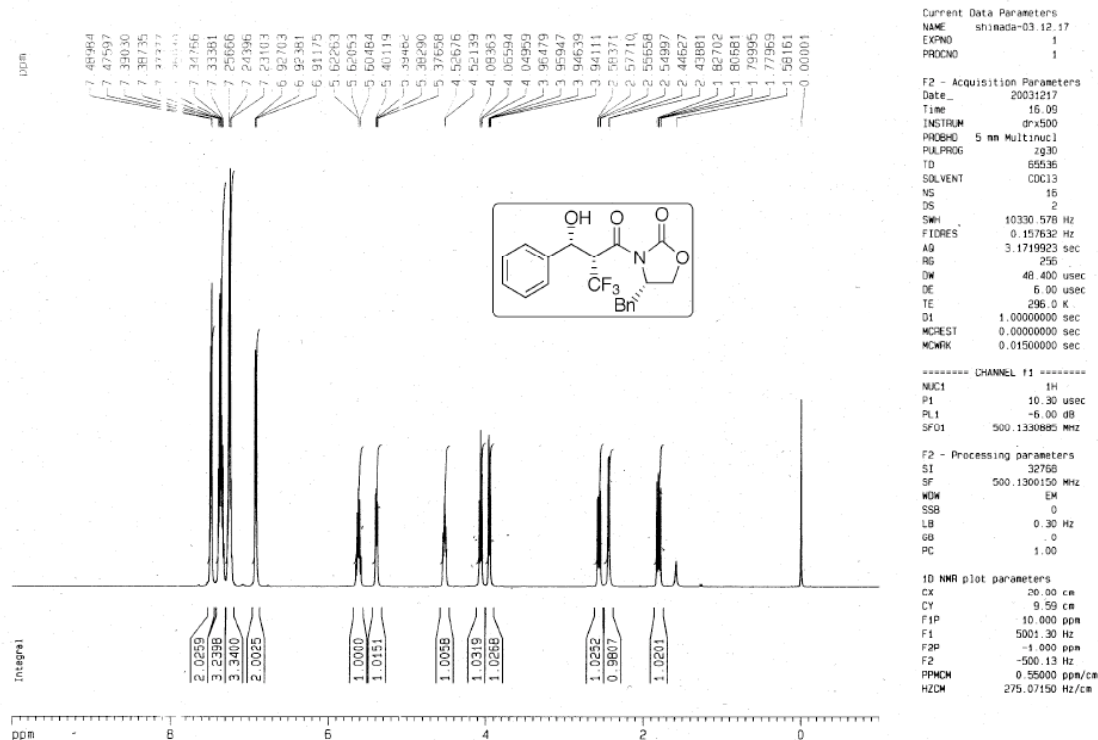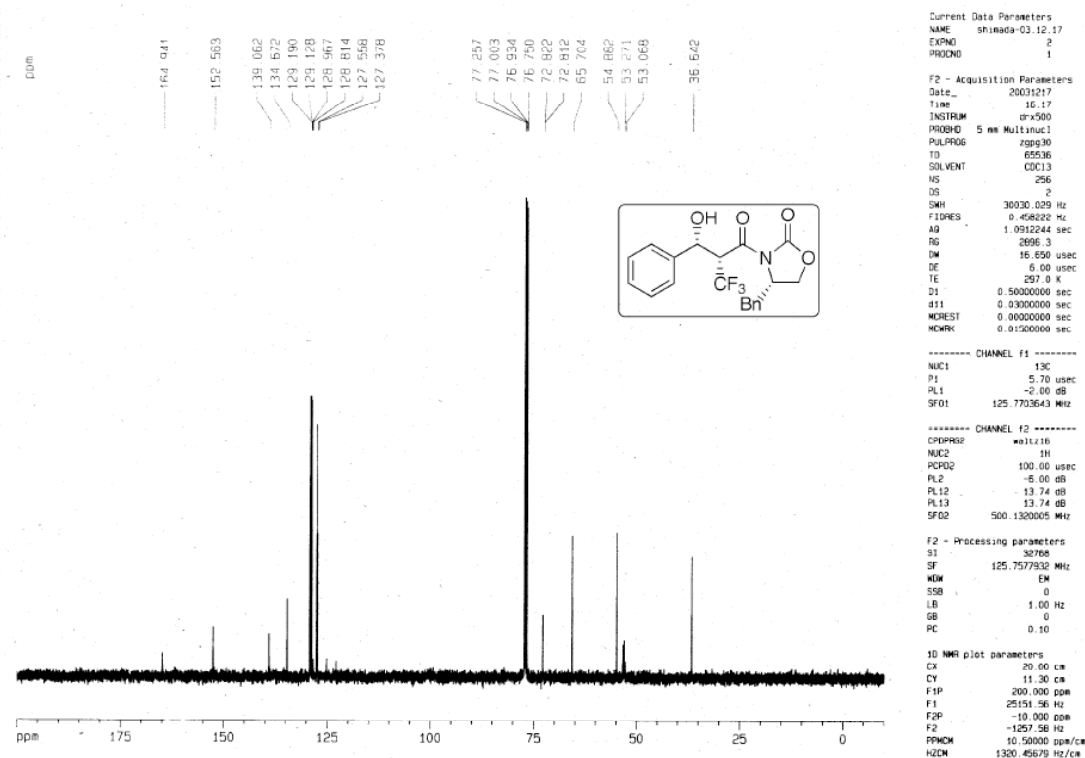

**anti-(2S,3S) (1a)**

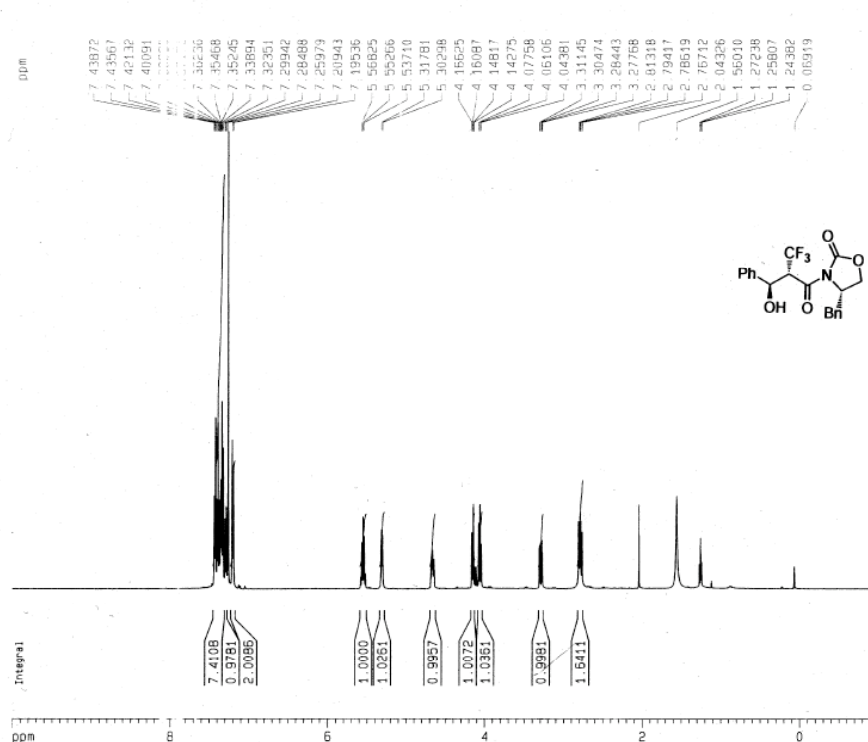

Current Data Parameters  
NAME yoshioka-03.10.10  
EXPNO 1  
PROCNO 1

F2 - Acquisition Parameters  
Date\_ 20031010  
Time 14.12  
INSTRUM drx500  
PROBHD 5 mm Multinuc1  
PULPROG zg30  
TD 65536  
SOLVENT CDCl3  
NS 16  
DS 2  
SWH 10330.578 Hz  
FIDRES 0.157632 Hz  
AQ 3.1719923 sec  
RG 812.7  
DM 48.400 usec  
DE 6.00 usec  
TE 295.9 K  
D1 1.00000000 sec  
MCREST 0.00000000 sec  
MCWRR 0.01500000 sec

===== CHANNEL f1 =====  
NUC1 1H  
P1 10.30 usec  
PL1 -6.00 dB  
SFO1 500.1330885 MHz

F2 - Processing parameters  
SI 32768  
SF 500.1300137 MHz  
WDW EM  
SSB 0  
LB 0.30 Hz  
GB 0  
PC 1.00

1D NMR plot parameters  
CX 20.00 cm  
CY 11.18 cm  
F1P 10.000 ppm  
F1 5001.30 Hz  
F2P -1.000 ppm  
F2 -500.13 Hz  
PPMCH 0.55000 ppm/cm  
HZCM 275.07150 Hz/cm

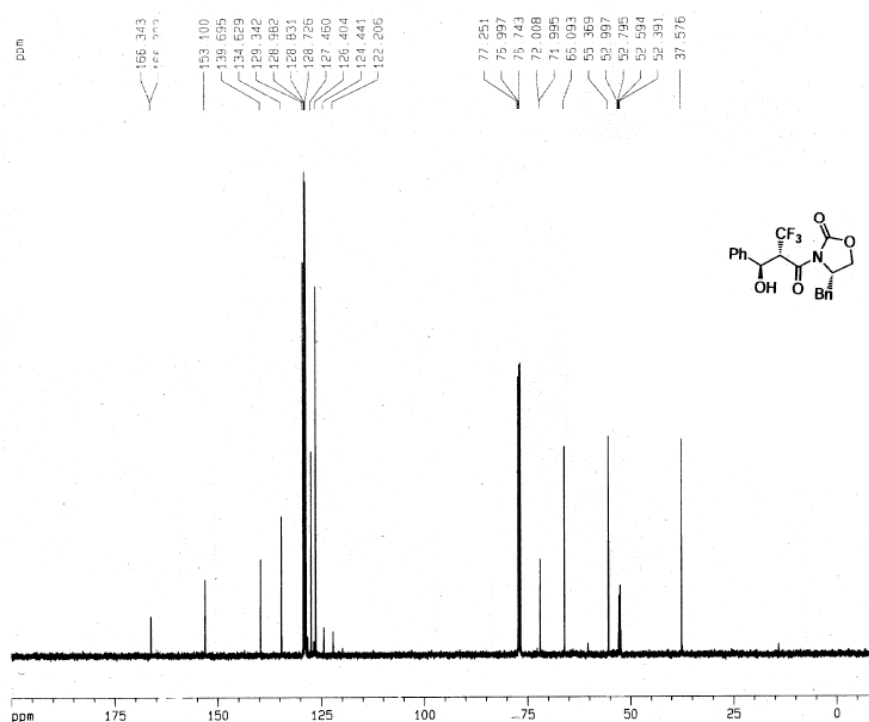

Current Data Parameters  
NAME yoshioka-R196  
EXPNO 2  
PROCNO 1

F2 - Acquisition Parameters  
Date\_ 20031023  
Time 18.51  
INSTRUM drx500  
PROBHD 5 mm Multinuc1  
PULPROG zgpg30  
TD 65536  
SOLVENT CDCl3  
NS 256  
DS 2  
SWH 30030.029 Hz  
FIDRES 0.458222 Hz  
AQ 1.0912244 sec  
RG 3649.1  
DM 16.650 usec  
DE 6.00 usec  
TE 296.5 K  
D1 0.50000000 sec  
d11 0.03000000 sec  
MCREST 0.00000000 sec  
MCWRR 0.01500000 sec

===== CHANNEL f1 =====  
NUC1 13C  
P1 5.70 usec  
PL1 -2.00 dB  
SFO1 125.7703643 MHz

===== CHANNEL f2 =====  
CPDPRG2 waltz16  
NUC2 1H  
P2P2 100.00 usec  
PL2 -6.00 dB  
PL12 13.74 dB  
PL13 13.74 dB  
SFO2 500.1320005 MHz

F2 - Processing parameters  
SI 32768  
SF 125.7577987 MHz  
WDW EM  
SSB 0  
LB 1.00 Hz  
GB 0  
PC 0.10

1D NMR plot parameters  
CX 20.00 cm  
CY 11.14 cm  
F1P 200.000 ppm  
F1 25151.56 Hz  
F2P -10.000 ppm  
F2 -1257.58 Hz  
PPMCH 10.50000 ppm/cm  
HZCM 1320.45679 Hz/cm

***syn*-(2*R*,3*S*) (1b)**

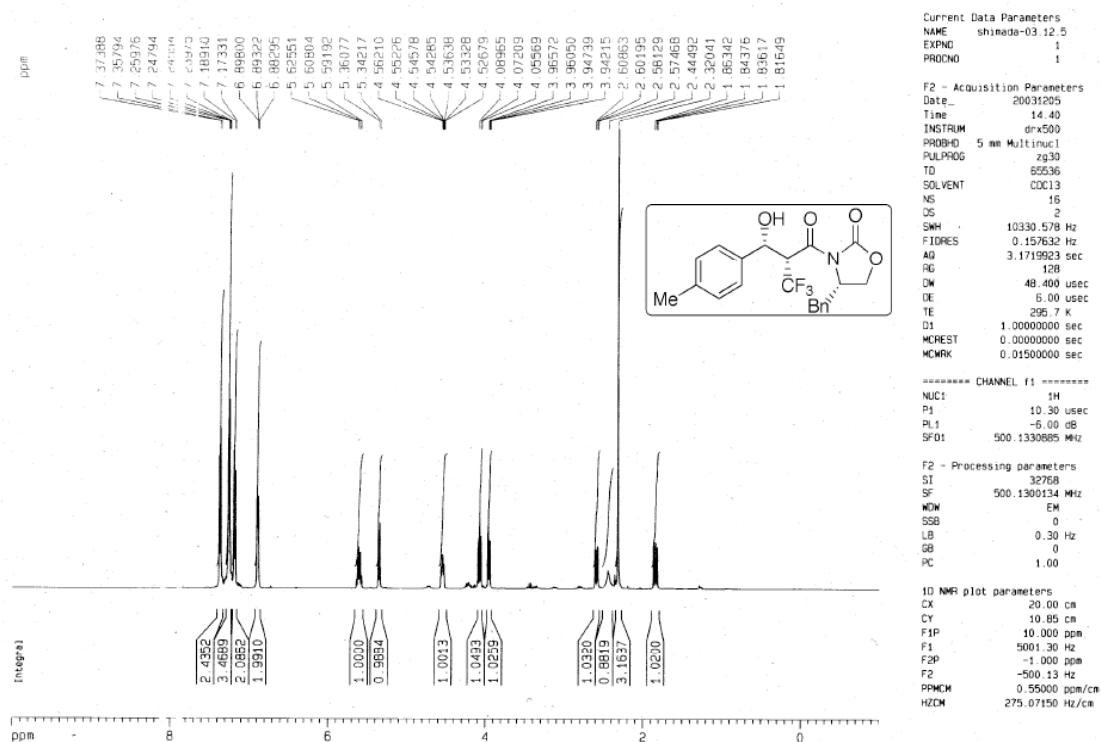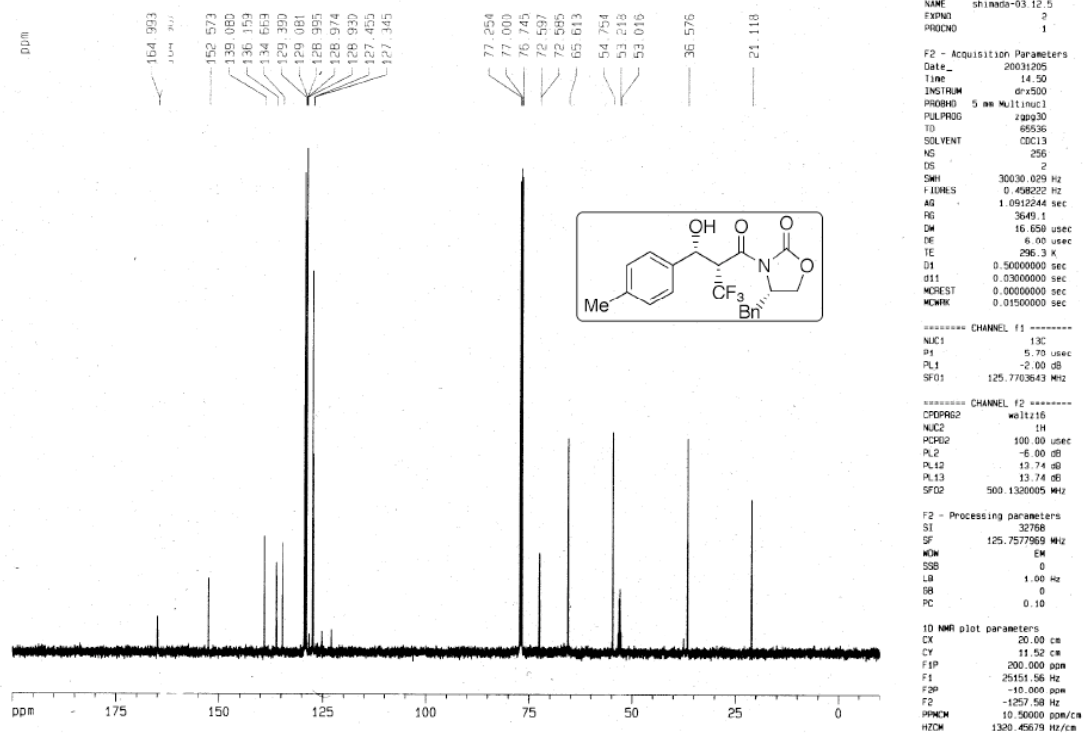

**anti-(2S,3S) (1b)**

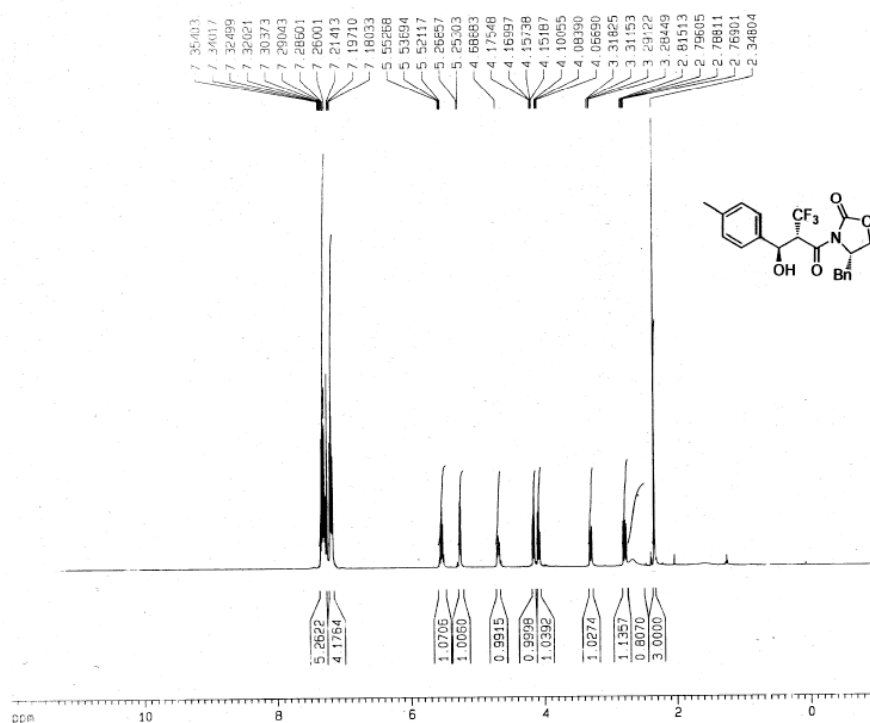

Current Data Parameters  
NAME yoshioka-0-Me  
EXPNO 1  
PROCNO 1

F2 - Acquisition Parameters  
Date\_ 20040429  
Time 17:30  
INSTRUM drx500  
PROBHD 5 mm Multinucl  
PULPROG zg30  
TD 86536  
SOLVENT CDCl3  
NS 15  
DS 2  
SWH 10330.576 Hz  
FIDRES 0.157632 Hz  
AQ 3.1779923 sec  
RG 362  
DW 48.700 usec  
DE 6.00 usec  
TE 296.3 K  
D1 0.00000000 sec  
MCREST 0.00000000 sec  
MCWRK 0.01500000 sec

===== CHANNEL f1 =====  
NUC1 1H  
P1 10.30 usec  
PL1 -6.02 dB  
SF01 500.1330885 MHz

F2 - Processing parameters  
SI 32768  
SF 500.1300134 MHz  
WDW EM  
SSB 0  
LB 0.30 Hz  
GB 0  
PC 1.00

1D NMR plot parameters  
CX 20.00 cm  
CY 10.32 cm  
F1P 12.000 ppm  
F1 6001.56 Hz  
F2P -1.000 ppm  
F2 -500.13 Hz  
PPHOM 0.65000 ppm/cm  
HZCM 325.08450 Hz/cm

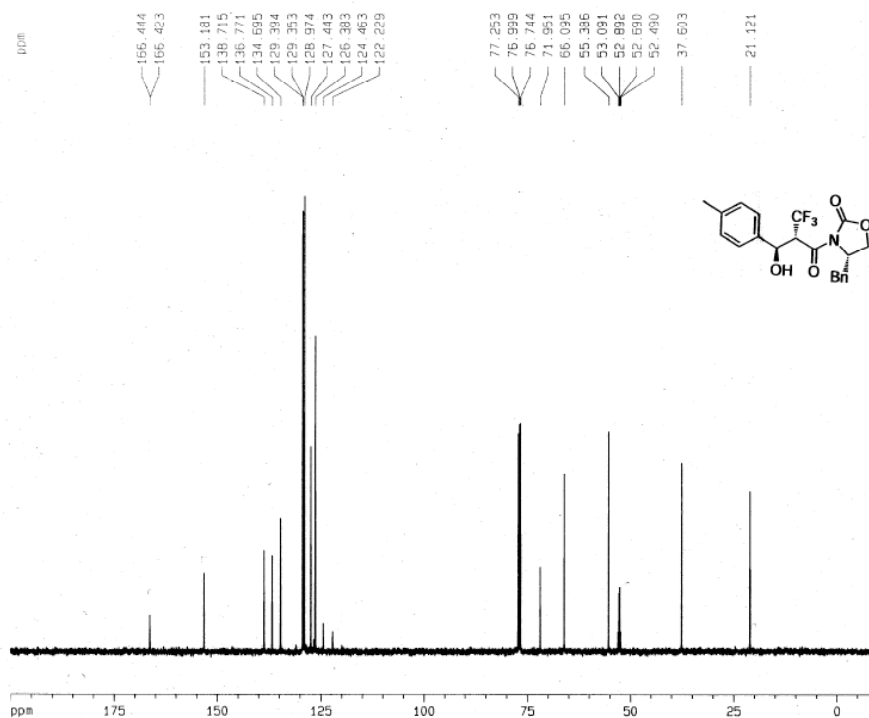

Current Data Parameters  
NAME yoshioka-04-S-21-2  
EXPNO 3  
PROCNO 1

F2 - Acquisition Parameters  
Date\_ 20040521  
Time 21:38  
INSTRUM drx500  
PROBHD 5 mm Multinucl  
PULPROG zgpg30  
TD 65536  
SOLVENT CDCl3  
NS 256  
DS 2  
SWH 30030.029 Hz  
FIDRES 0.458222 Hz  
AQ 1.0912244 sec  
RG 5160.6  
DW 16.650 usec  
DE 6.00 usec  
TE 297.6 K  
D1 0.50000000 sec  
S11 0.03000000 sec  
MCREST 0.00000000 sec  
MCWRK 0.01500000 sec

===== CHANNEL f1 =====  
NUC1 13C  
P1 5.70 usec  
PL1 -2.00 dB  
SF01 125.7703643 MHz

===== CHANNEL f2 =====  
CPDPRG2 waltz16  
NUC2 1H  
PCPD2 100.00 usec  
PL2 -6.00 dB  
PL12 13.74 dB  
PL13 13.74 dB  
SF02 500.1320005 MHz

F2 - Processing parameters  
SI 32768  
SF 125.7577978 MHz  
WDW EM  
SSB 0  
LB 1.00 Hz  
GB 0  
PC 1.40

1D NMR plot parameters  
CX 20.00 cm  
CY 10.43 cm  
F1P 200.000 ppm  
F1 25151.56 Hz  
F2P -10.000 ppm  
F2 -125.750 Hz  
PPHOM 10.50000 ppm/cm  
HZCM 1320.45679 Hz/cm

***syn*-(2*R*,3*S*) (1c)**

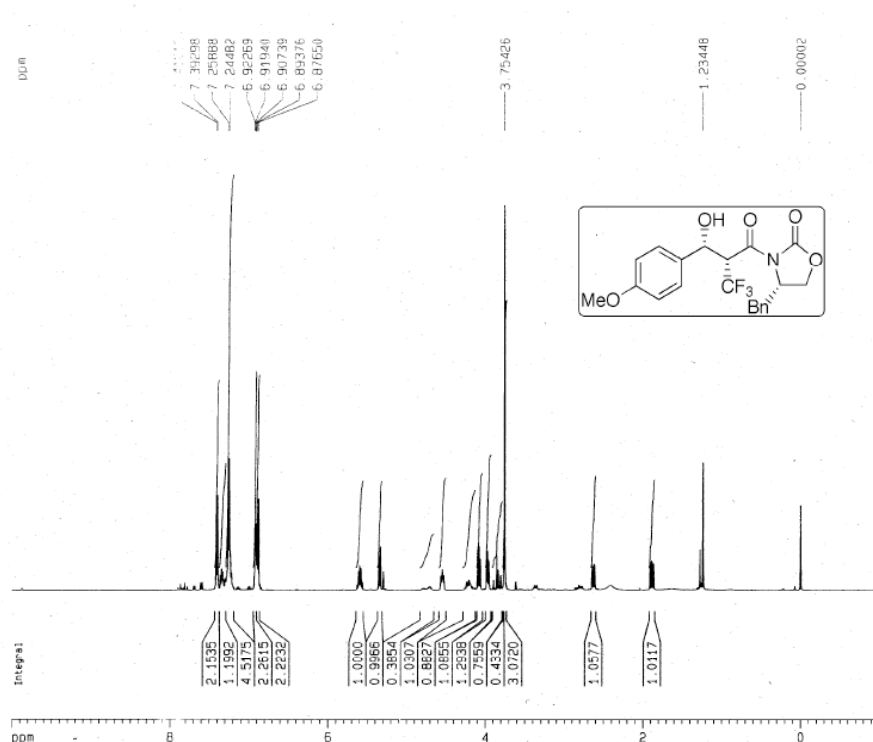

Current Data Parameters  
NAME shimada-03.12.11  
EXPNO 1  
PROCNO 1

F2 - Acquisition Parameters  
Date\_ 20031211  
Time 12.31  
INSTRUM drx500  
PROBHD 5 mm Multinuc1  
PULPROG zg30  
TD 65536  
SOLVENT CDCl3  
NS 16  
DS 2  
SWH 10330.578 Hz  
FIDRES 0.157632 Hz  
AQ 3.1719923 sec  
RG 181  
DM 48.400 usec  
DE 6.00 usec  
TE 295.5 K  
D1 1.00000000 sec  
MCREST 0.00000000 sec  
MCMRK 0.01500000 sec

===== CHANNEL f1 =====  
NUC1 1H  
P1 10.30 usec  
PL1 -6.00 dB  
SFO1 500.1300995 MHz

F2 - Processing parameters  
SI 32768  
SF 500.1300137 MHz  
WDW EM  
SSB 0  
LB 0.30 Hz  
GB 0  
PC 1.00

1D NMR plot parameters  
CX 20.00 cm  
CY 8.87 cm  
F1P 10.000 ppm  
F1 5001.30 Hz  
F2P -1.000 ppm  
F2 -500.13 Hz  
PPMCM 0.55000 ppm/cm  
HZCM 275.07150 Hz/cm

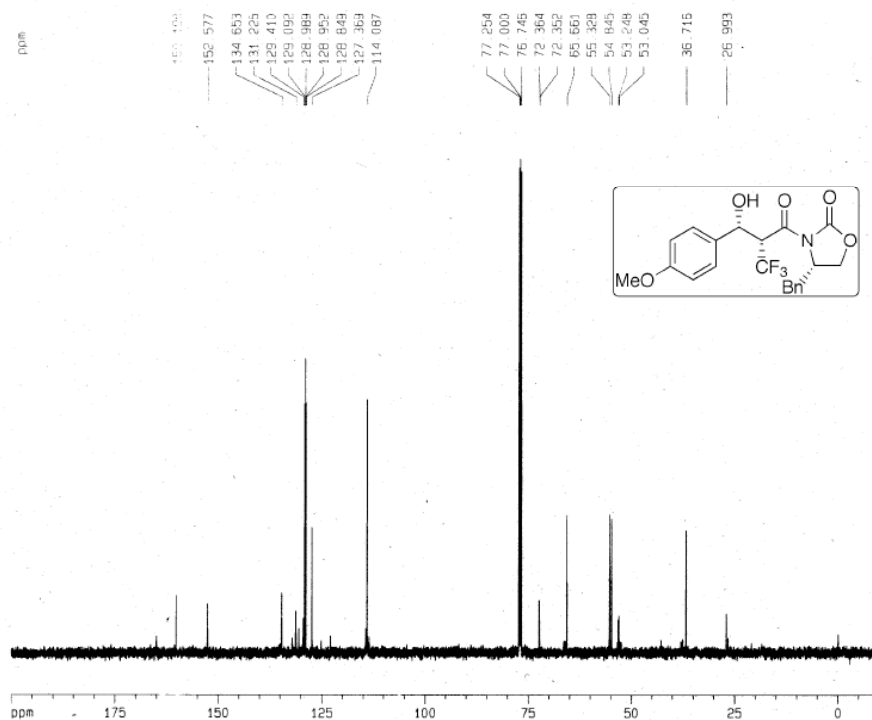

Current Data Parameters  
NAME shimada-03.12.11  
EXPNO 2  
PROCNO 1

F2 - Acquisition Parameters  
Date\_ 20031211  
Time 12.40  
INSTRUM drx500  
PROBHD 5 mm Multinuc1  
PULPROG zgpg30  
TD 65536  
SOLVENT CDCl3  
NS 256  
DS 2  
SWH 30030.029 Hz  
FIDRES 0.458022 Hz  
AQ 1.0912244 sec  
RG 4096  
DM 15.650 usec  
DE 6.00 usec  
TE 295.0 K  
D1 0.50000000 sec  
S11 0.03000000 sec  
MCREST 0.00000000 sec  
MCMRK 0.01500000 sec

===== CHANNEL f1 =====  
NUC1 13C  
P1 5.70 usec  
PL1 -2.00 dB  
SFO1 125.7703643 MHz

===== CHANNEL f2 =====  
CPDPRG2 waltz16  
NUC2 1H  
PCPD2 100.00 usec  
PL2 -6.00 dB  
PL12 13.74 dB  
PL13 13.74 dB  
SFO2 500.1320005 MHz

F2 - Processing parameters  
SI 32768  
SF 125.7577951 MHz  
WDW EM  
SSB 0  
LB 1.00 Hz  
GB 0  
PC 0.10

1D NMR plot parameters  
CX 20.00 cm  
CY 11.27 cm  
F1P 200.000 ppm  
F1 25151.56 Hz  
F2P -10.000 ppm  
F2 -125.758 Hz  
PPMCM 10.50000 ppm/cm  
HZCM 1320.45679 Hz/cm



**anti-(2S,3S) (1c)**

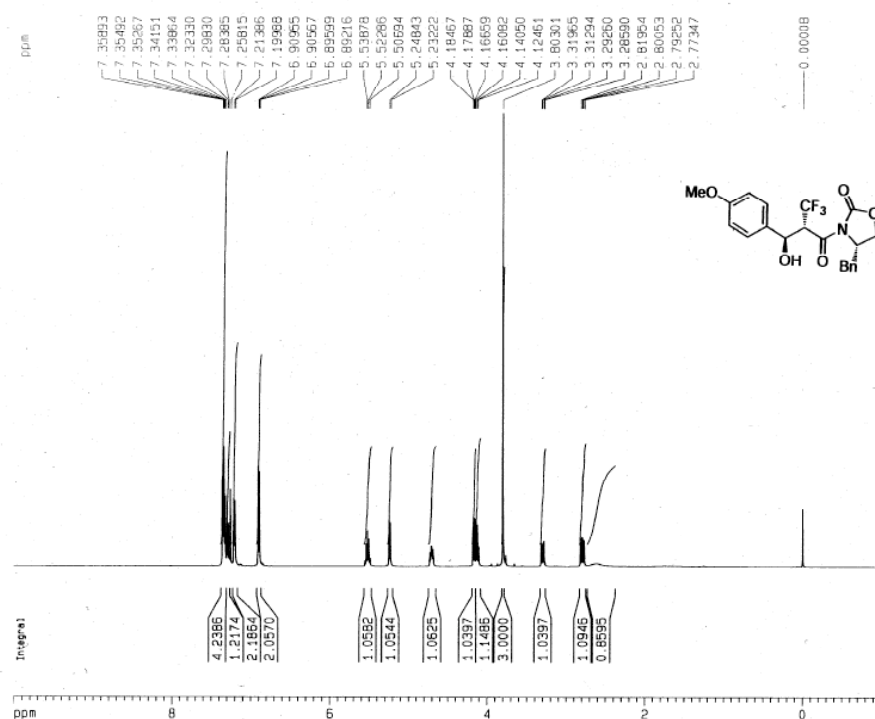

Current Data Parameters  
NAME yeshioka-04.5.21  
EXPNO 1  
PROCNO 1

F2 - Acquisition Parameters  
Date\_ 20040521  
Time 11:56  
INSTRUM drx500  
PROBHD 5 mm Multinuc1  
PULPROG zg30  
TD 65536  
SOLVENT CDCl3  
NS 16  
DS 2  
SWH 10330.578 Hz  
FIDRES 0.157632 Hz  
AQ 3.171923 sec  
RG 287.4  
DM 48.400 usec  
DE 6.00 usec  
TE 296.6 K  
D1 1.00000000 sec  
MCHREST 0.05000000 sec  
MCHW 0.01500000 sec

===== CHANNEL f1 =====  
NUC1 1H  
P1 10.30 usec  
PL1 -6.00 dB  
SF01 500.1330885 MHz

F2 - Processing parameters  
SI 32768  
SF 500.1300144 MHz  
WDW EM  
SSB 0  
LB 0.30 Hz  
GB 0  
PC 1.00

1D NMR plot parameters  
CX 20.00 cm  
CY 10.39 cm  
F1P 10.000 ppm  
F1 500.130 Hz  
F2P -1.000 ppm  
F2 -500.13 Hz  
PPHCH 0.55000 ppm/cm  
HZCH 275.07150 Hz/cm

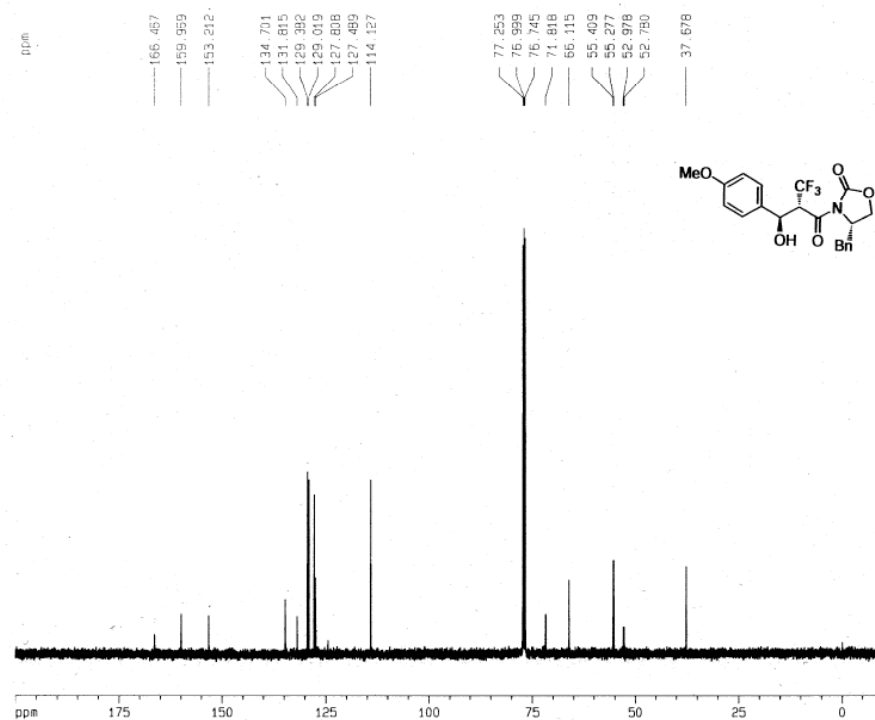

Current Data Parameters  
NAME yeshioka-04.5.21  
EXPNO 2  
PROCNO 1

F2 - Acquisition Parameters  
Date\_ 20040521  
Time 12:05  
INSTRUM drx500  
PROBHD 5 mm Multinuc1  
PULPROG zgpg30  
TD 65536  
SOLVENT CDCl3  
NS 256  
DS 2  
SWH 30030.029 Hz  
FIDRES 0.458222 Hz  
AQ 1.0912244 sec  
RG 1625.5  
DM 16.950 usec  
DE 6.00 usec  
TE 297.5 K  
D1 0.50000000 sec  
d11 0.03000000 sec  
MCHREST 0.00000000 sec  
MCHW 0.01500000 sec

===== CHANNEL f1 =====  
NUC1 13C  
P1 5.70 usec  
PL1 -2.00 dB  
SF01 125.7703643 MHz

===== CHANNEL f2 =====  
CPDPRG2 waltz16  
NUC2 1H  
PCPD2 100.00 usec  
PL2 -6.00 dB  
PL12 13.74 dB  
PL13 13.74 dB  
SF02 500.1320005 MHz

F2 - Processing parameters  
SI 32768  
SF 125.7577932 MHz  
WDW EM  
SSB 0  
LB 1.00 Hz  
GB 0  
PC 1.40

1D NMR plot parameters  
CX 20.00 cm  
CY 9.72 cm  
F1P 200.000 ppm  
F1 25151.56 Hz  
F2P -10.000 ppm  
F2 -125.50 Hz  
PPHCH 10.50000 ppm/cm  
HZCH 1320.45679 Hz/cm

***syn*-(2*R*,3*S*) (1*d*)**

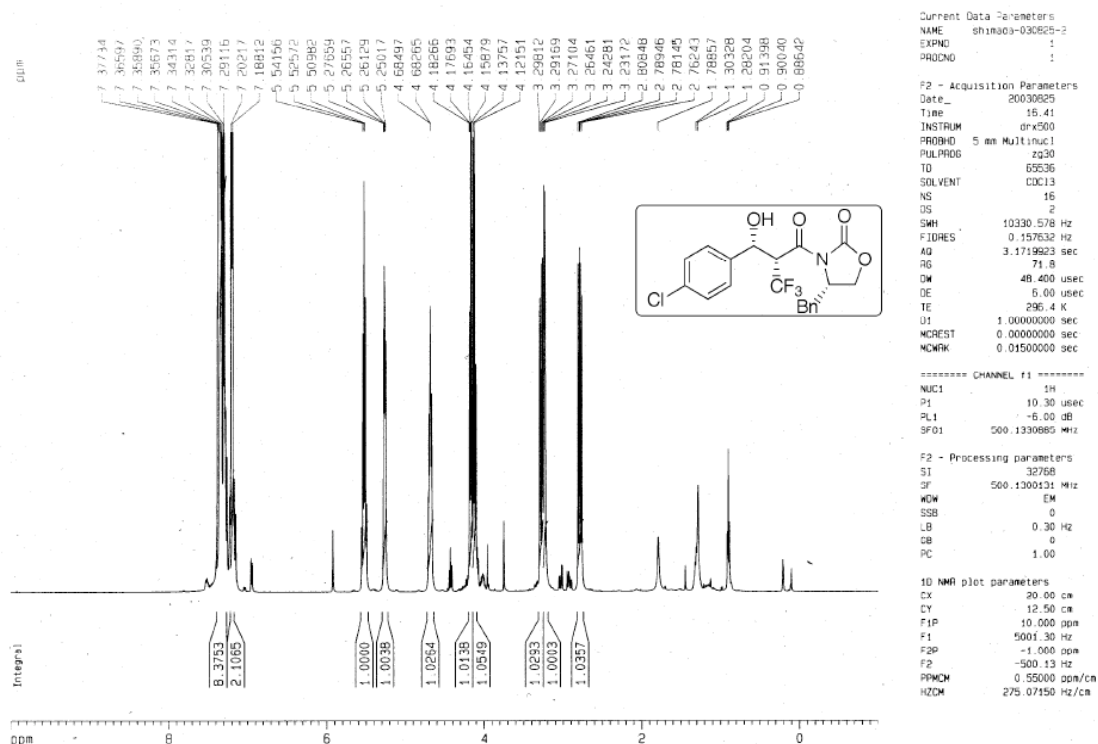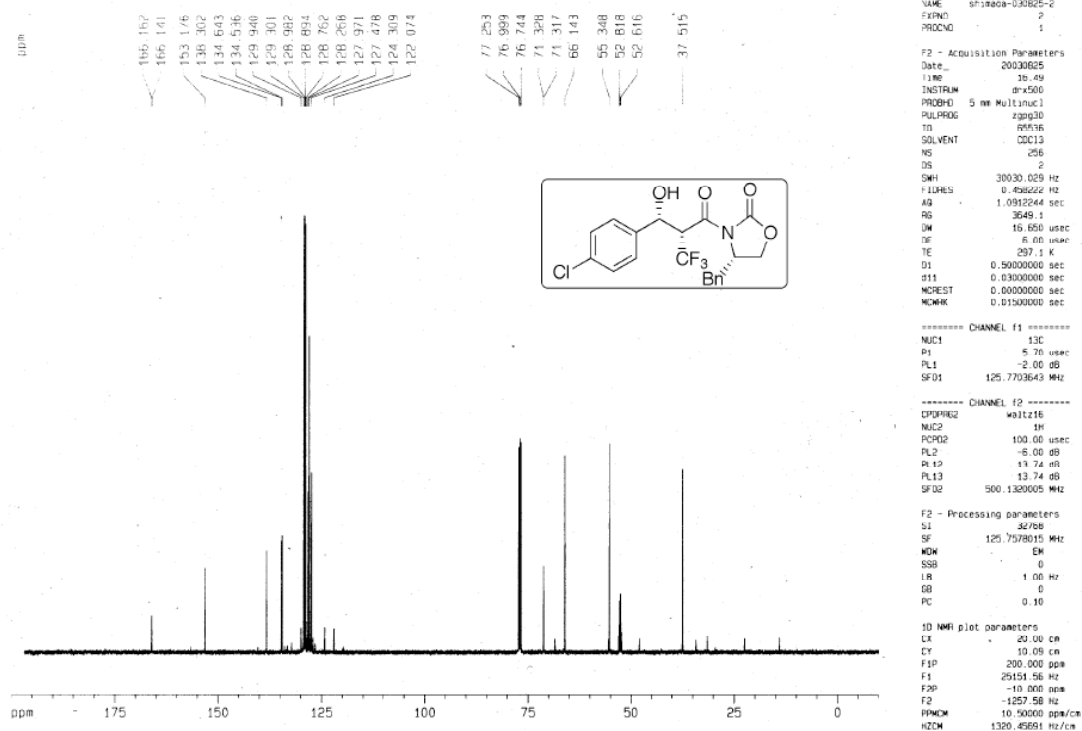

**anti-(2S,3S) (1d)**

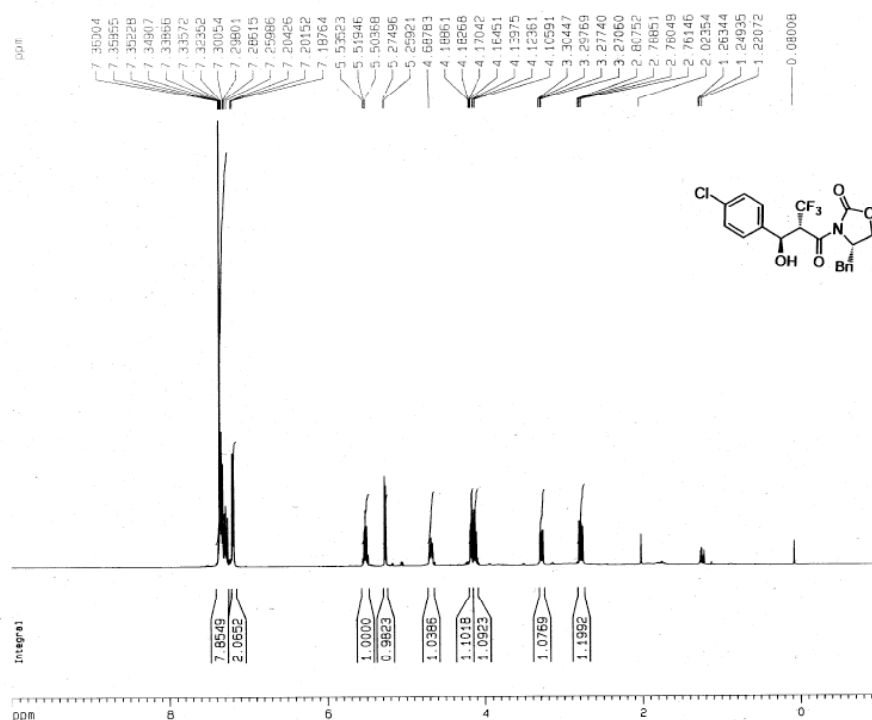

Current Data Parameters  
 NAME yoshioka-04.5.21-2  
 EXPNO 1  
 PROCNO 1

F2 - Acquisition Parameters  
 Date\_ 20040521  
 Time 21.19  
 INSTRUM 9H500  
 PROBHD 5 mm Multinuc1  
 PULPROG zg30  
 TD 65536  
 SOLVENT CDCl3  
 NS 16  
 DS 2  
 SWH 10330.578 Hz  
 FIDRES 0.157632 Hz  
 AQ 3.1719923 sec  
 RG 128  
 DM 48.400 usec  
 DE 6.00 usec  
 TE 296.5 K  
 D1 1.00000000 sec  
 MCHRES 0.00000000 sec  
 MCHW 0.01500000 sec

===== CHANNEL f1 =====  
 NUC1 1H  
 P1 10.30 usec  
 PL1 -6.00 dB  
 SFO1 500.1330885 MHz

F2 - Processing parameters  
 SI 32768  
 SF 500.1300134 MHz  
 MDW EM  
 SSB 0  
 LB 0.30 Hz  
 GB 0  
 PC 1.00

1D NMR plot parameters  
 CX 20.00 cm  
 CY 10.35 cm  
 F1P 10.000 ppm  
 F1 5001.30 Hz  
 F2P -1.000 ppm  
 F2 -500.13 Hz  
 PPMCH 0.55000 ppm/cm  
 HZCM 275.07150 Hz/cm

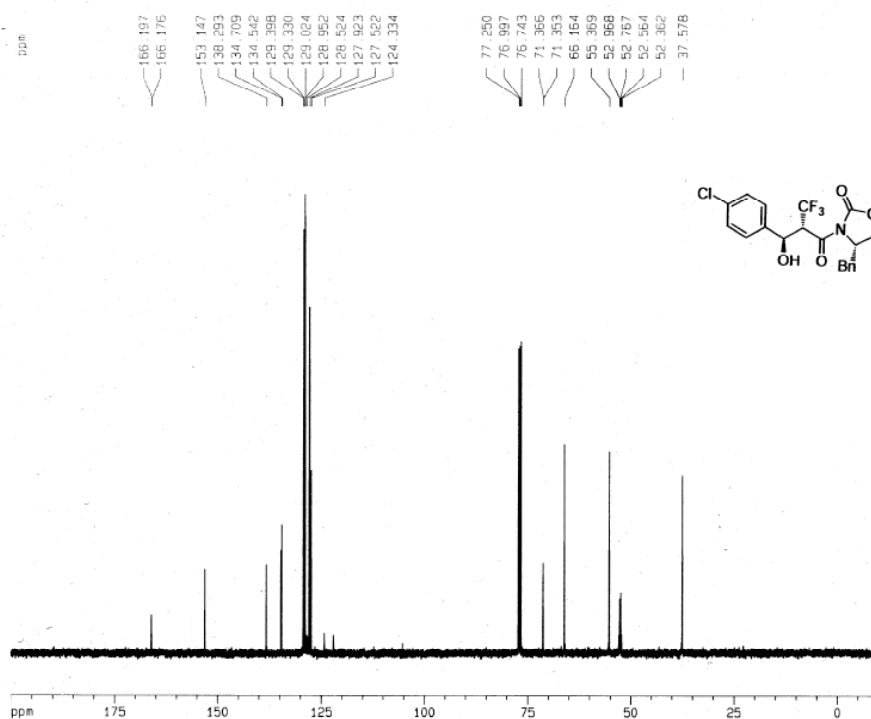

Current Data Parameters  
 NAME yoshioka-04.5.21-2  
 EXPNO 2  
 PROCNO 1

F2 - Acquisition Parameters  
 Date\_ 20040521  
 Time 21.27  
 INSTRUM 9H500  
 PROBHD 5 mm Multinuc1  
 PULPROG zgpg30  
 TD 65536  
 SOLVENT CDCl3  
 NS 256  
 DS 2  
 SWH 30030.029 Hz  
 FIDRES 0.458222 Hz  
 AQ 1.0912244 sec  
 RG 5150.6  
 DM 16.650 usec  
 DE 6.00 usec  
 TE 297.5 K  
 D1 0.50000000 sec  
 d11 0.03000000 sec  
 MCHRES 0.00000000 sec  
 MCHW 0.01500000 sec

===== CHANNEL f1 =====  
 NUC1 13C  
 P1 5.70 usec  
 PL1 -2.00 dB  
 SFO1 125.7703643 MHz

===== CHANNEL f2 =====  
 CPDPRG2 waltz16  
 NUC2 1H  
 PCPD2 100.00 usec  
 PL2 -6.00 dB  
 PL12 13.74 dB  
 PL13 13.74 dB  
 SFO2 500.1320005 MHz

F2 - Processing parameters  
 SI 32768  
 SF 125.7577960 MHz  
 MDW EM  
 SSB 0  
 LB 1.00 Hz  
 GB 0  
 PC 1.40

1D NMR plot parameters  
 CX 20.00 cm  
 CY 10.31 cm  
 F1P 200.000 ppm  
 F1 25151.56 Hz  
 F2P -10.000 ppm  
 F2 -125.758 Hz  
 PPMCH 10.50000 ppm/cm  
 HZCM 1320.45679 Hz/cm

***syn*-(2*R*,3*S*) (1e)**

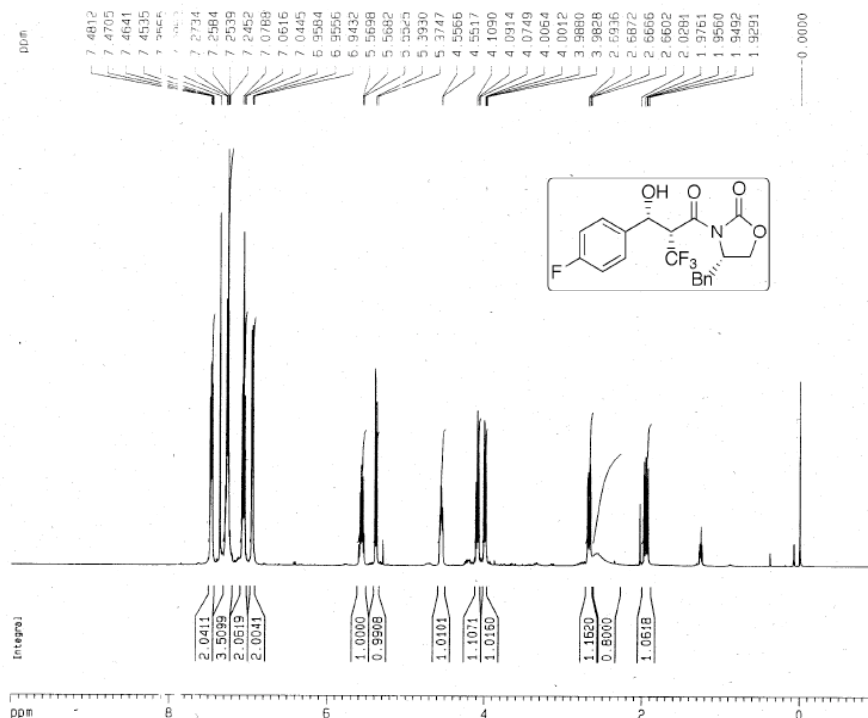

Current Data Parameters  
 NAME shimada-03.12.12  
 EXPNO 1  
 PROCNO 1  
 F2 - Acquisition Parameters  
 Date\_ 20031212  
 Time 18.35  
 INSTRUM drx500  
 PROBHD 5 mm Multinucl  
 PULPROG zg30  
 TO 655.36  
 SOLVENT CDCl3  
 NS 16  
 DS 2  
 SWH 10330.578 Hz  
 FIDRES 0.157632 Hz  
 AQ 3.1719823 sec  
 RG 128  
 DW 48.400 usec  
 DE 6.00 usec  
 TE 295.9 K  
 D1 1.00000000 sec  
 MCREST 0.00000000 sec  
 MCMRK 0.01500000 sec

\*\*\*\*\* CHANNEL f1 \*\*\*\*\*  
 NUC1 1H  
 P1 10.30 usec  
 PL1 -6.00 dB  
 SFO1 500.1330885 MHz  
 F2 - Processing parameters  
 SI 32768  
 SF 500.1330163 MHz  
 MDW EM  
 SSB 0  
 LB 0.30 Hz  
 GB 0  
 PC 1.00

1D NMR plot parameters  
 CX 20.00 cm  
 CY 9.51 cm  
 F1P 10.000 ppm  
 F1 5001.30 Hz  
 F2P -1.000 ppm  
 F2 -500.13 Hz  
 PRMCH 0.55000 ppm/cm  
 HZCM 275.07150 Hz/cm

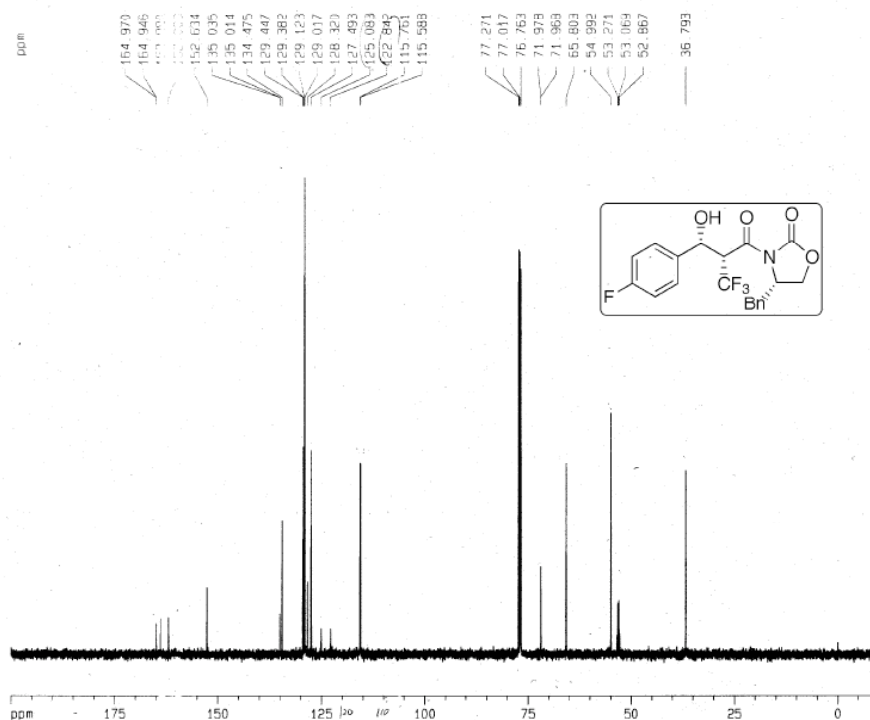

Current Data Parameters  
 NAME shimada-03.12.12  
 EXPNO 2  
 PROCNO 1  
 F2 - Acquisition Parameters  
 Date\_ 20031212  
 Time 19.03  
 INSTRUM drx500  
 PROBHD 5 mm Multinucl  
 PULPROG zgpg30  
 TO 655.36  
 SOLVENT CDCl3  
 NS 256  
 DS 2  
 SWH 30030.029 Hz  
 FIDRES 0.458222 Hz  
 AQ 1.0912244 sec  
 RG 3649.1  
 DW 15.550 usec  
 DE 6.00 usec  
 TE 295.9 K  
 D1 0.50000000 sec  
 S11 0.03000000 sec  
 MCREST 0.00000000 sec  
 MCMRK 0.01500000 sec

\*\*\*\*\* CHANNEL f1 \*\*\*\*\*  
 NUC1 13C  
 P1 5.70 usec  
 PL1 -2.00 dB  
 SFO1 125.7703643 MHz  
 \*\*\*\*\* CHANNEL f2 \*\*\*\*\*  
 CPOH62 waltz16  
 NUC2 1H  
 PCP02 100.00 usec  
 PL2 -6.00 dB  
 PL12 13.74 dB  
 PL13 13.74 dB  
 SFO2 500.1320005 MHz

F2 - Processing parameters  
 SI 32768  
 SF 125.7577332 MHz  
 MDW EM  
 SSB 0  
 LB 1.00 Hz  
 GB 0  
 PC 0.10  
 1D NMR plot parameters  
 CX 20.00 cm  
 CY 10.89 cm  
 F1P 200.000 ppm  
 F1 25153.56 Hz  
 F2P -10.000 ppm  
 F2 -1257.56 Hz  
 PRMCH 10.50000 ppm/cm  
 HZCM 1320.45679 Hz/cm

***syn*-(2*R*,3*S*) (1f)**

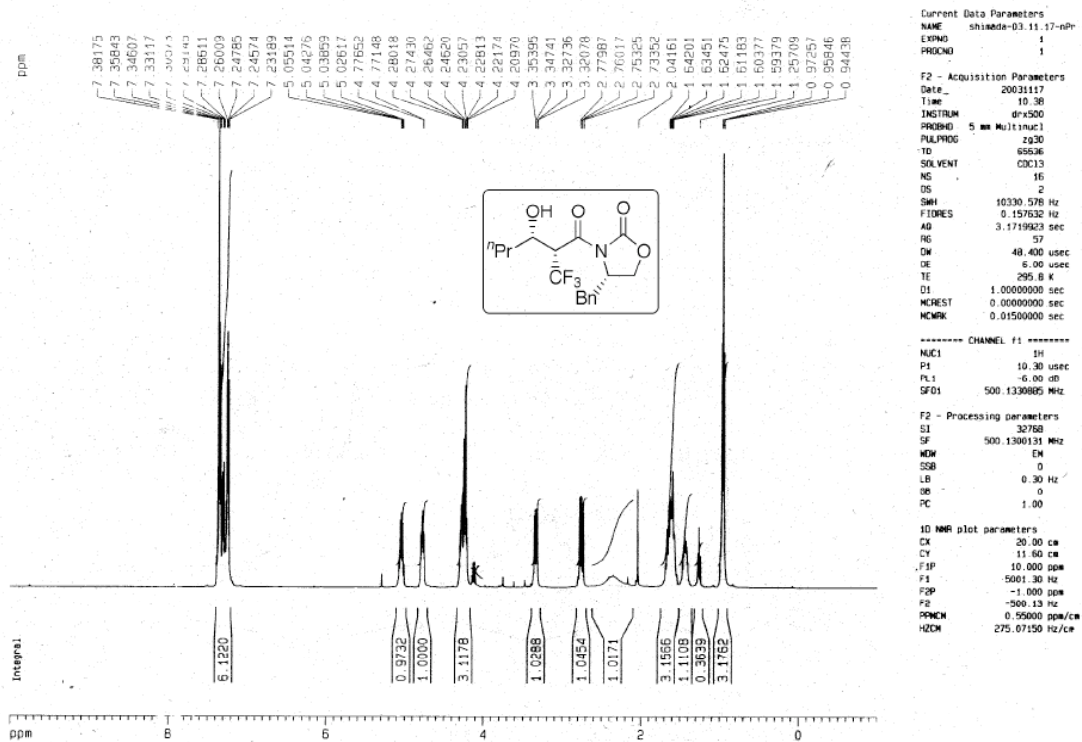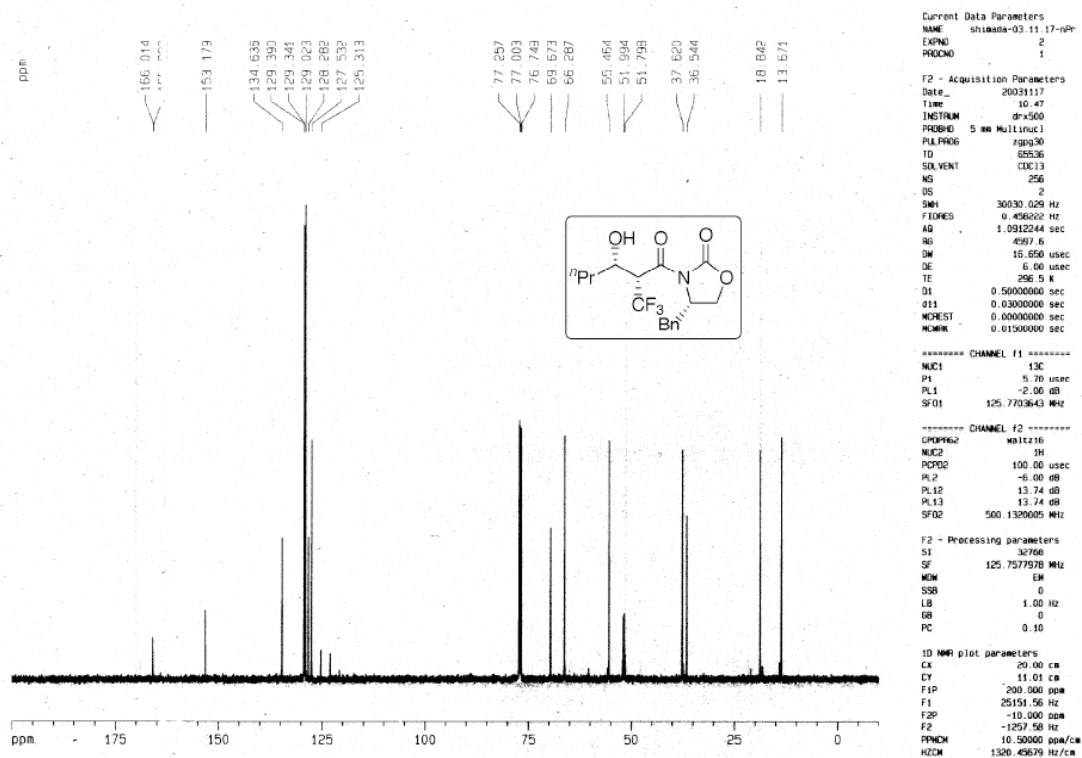

**anti-(2S,3S) (1f)**

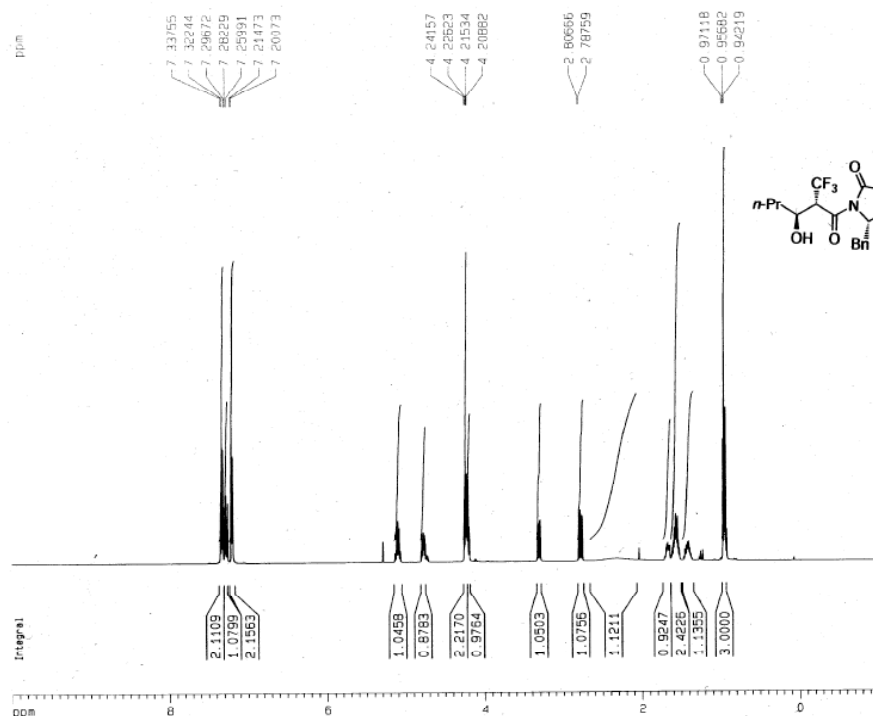

***syn*-(2*R*,3*S*) (1g)**

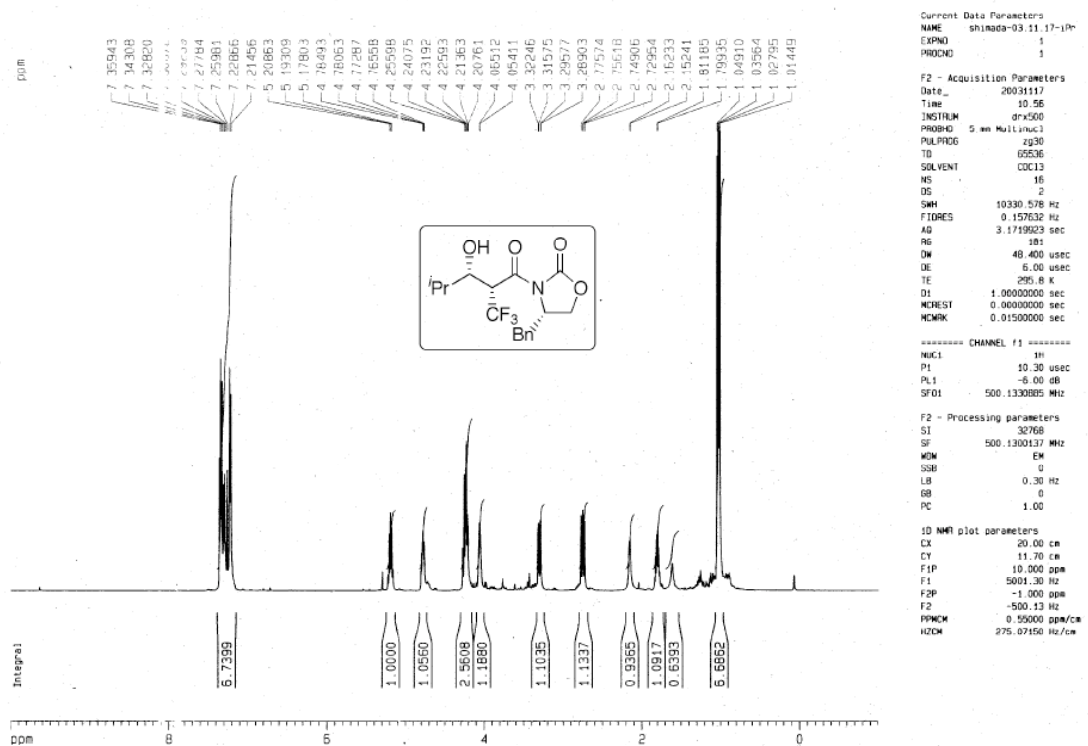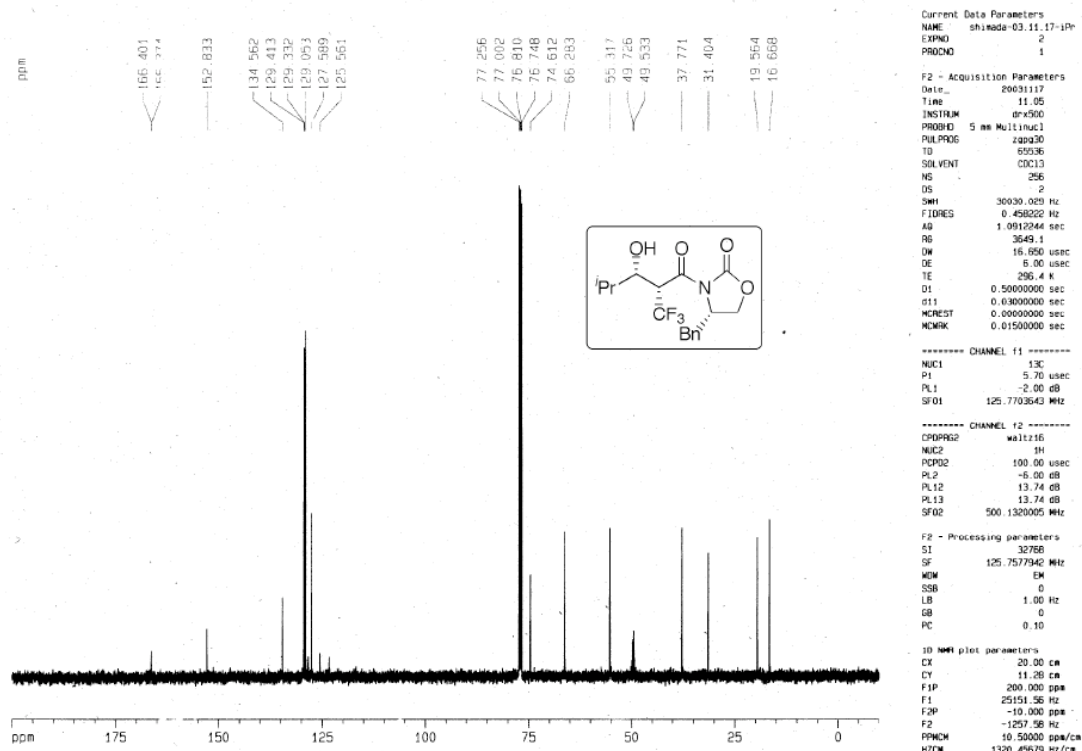

**anti-(2S,3S) (1g)**

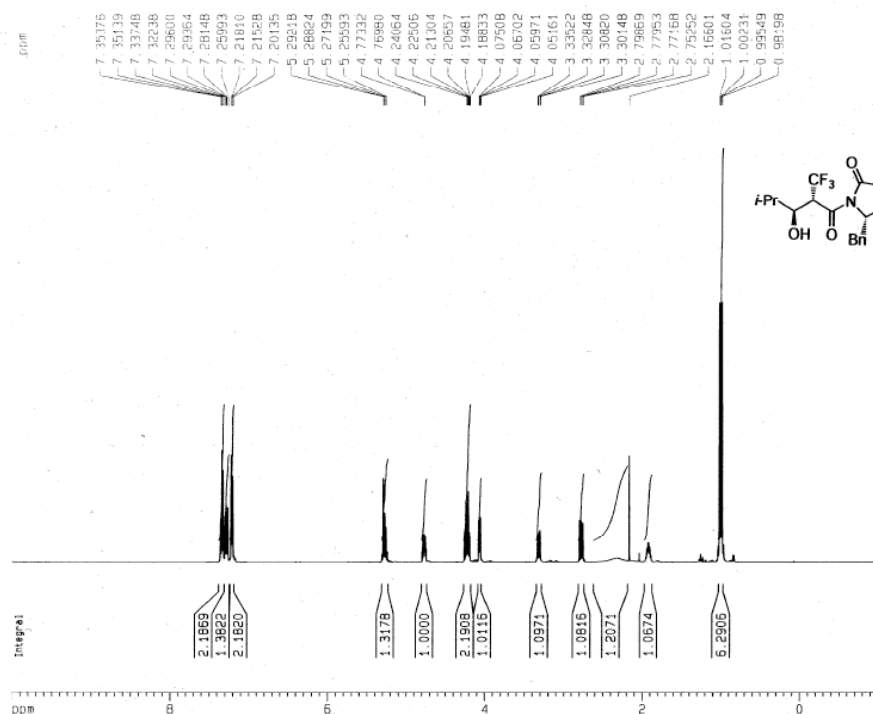

Current Data Parameters  
NAME yoshioka-sample2  
EXPNO 1  
PROCNO 1

F2 - Acquisition Parameters  
Date\_ 20040608  
Time 9.26  
INSTRUM dx500  
PROBHD 5 mm Multinuc1  
PULPROG zg30  
TD 65536  
SOLVENT CDCl3  
NS 16  
DS 2  
SWH 10330.576 Hz  
FIDRES 0.157632 Hz  
AQ 3.1719923 sec  
RG 128  
DM 48.400 usec  
DE 6.00 usec  
TE 297.3 K  
D1 1.00000000 sec  
MCREST 0.00000000 sec  
MCMRK 0.01500000 sec

\*\*\*\*\* CHANNEL f1 \*\*\*\*\*  
NUC1 1H  
P1 10.30 usec  
PL1 -6.00 dB  
SF01 500.1330895 MHz

F2 - Processing parameters  
SI 32768  
SF 500.1300134 MHz  
WDW EM  
SSB 0  
LB 0.30 Hz  
GB 0  
PC 1.00

1D NMR plot parameters  
CX 20.00 cm  
CY 6.51 cm  
F1P 10.000 ppm  
F1 5001.30 Hz  
F2P -1.000 ppm  
F2 -500.13 Hz  
PPHMM 0.55000 ppm/cm  
HZCM 275.07150 Hz/cm

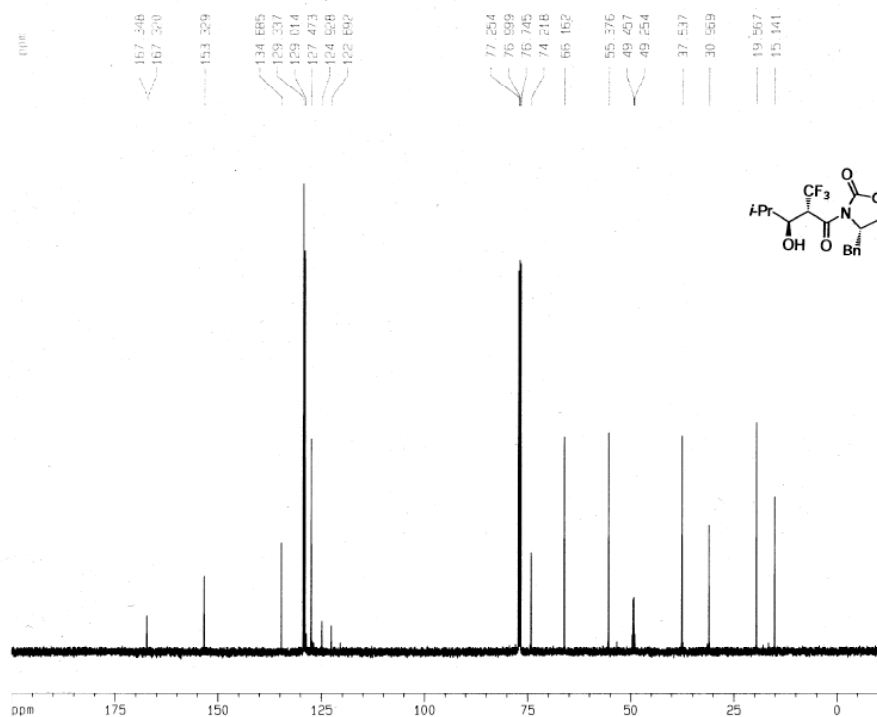

Current Data Parameters  
NAME yoshioka-sample2  
EXPNO 2  
PROCNO 1

F2 - Acquisition Parameters  
Date\_ 20040608  
Time 9.34  
INSTRUM dx500  
PROBHD 5 mm Multinuc1  
PULPROG zgpg30  
TD 65536  
SOLVENT CDCl3  
NS 256  
DS 2  
SWH 30030.029 Hz  
FIDRES 0.458222 Hz  
AQ 1.0512244 sec  
RG 1625.5  
DM 16.650 usec  
DE 6.00 usec  
TE 298.2 K  
D1 0.50000000 sec  
d11 0.03000000 sec  
MCREST 0.00000000 sec  
MCMRK 0.01500000 sec

\*\*\*\*\* CHANNEL f1 \*\*\*\*\*  
NUC1 13C  
P1 5.70 usec  
PL1 -2.00 dB  
SF01 125.7703643 MHz

\*\*\*\*\* CHANNEL f2 \*\*\*\*\*  
CPDPRG2 waltz16  
NUC2 1H  
P2P2 100.00 usec  
PL2 -6.00 dB  
PL12 13.74 dB  
PL13 13.74 dB  
SF02 500.1330895 MHz

F2 - Processing parameters  
SI 32768  
SF 125.7517951 MHz  
WDW EM  
SSB 0  
LB 1.00 Hz  
GB 0  
PC 1.40

1D NMR plot parameters  
CX 20.00 cm  
CY 10.05 cm  
F1P 200.000 ppm  
F1 25151.56 Hz  
F2P -10.000 ppm  
F2 -125.758 Hz  
PPHMM 10.50000 ppm/cm  
HZCM 1320.45679 Hz/cm



***syn*-(2*R*,3*S*) (1h)**

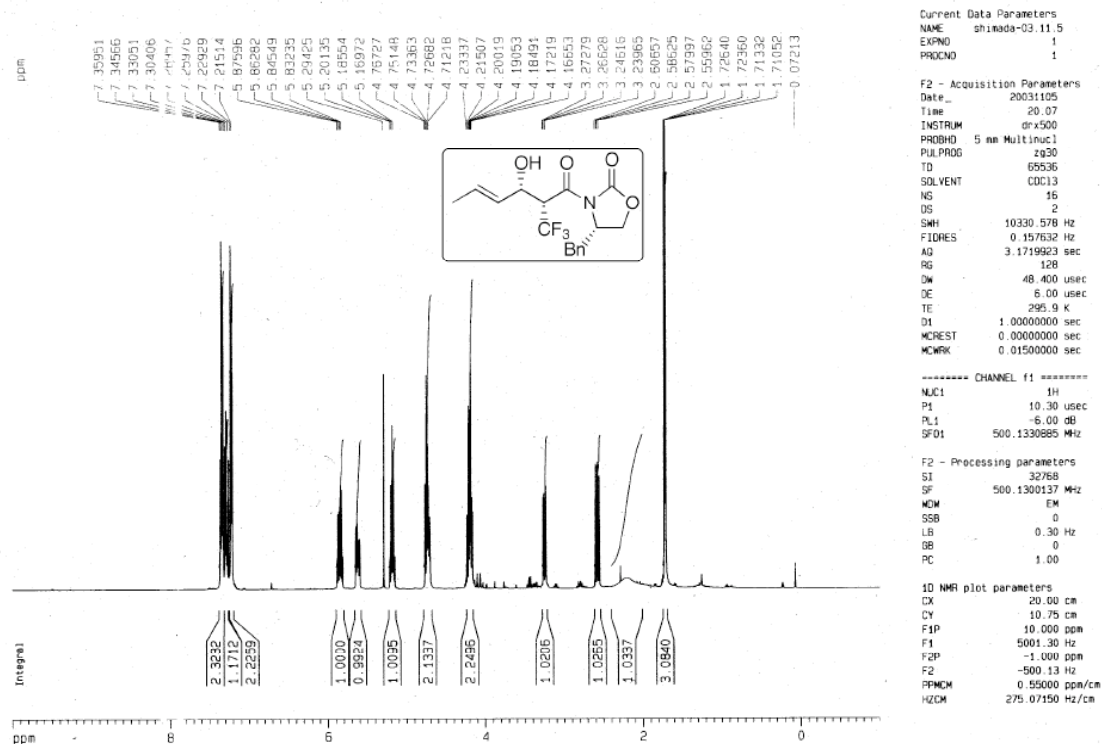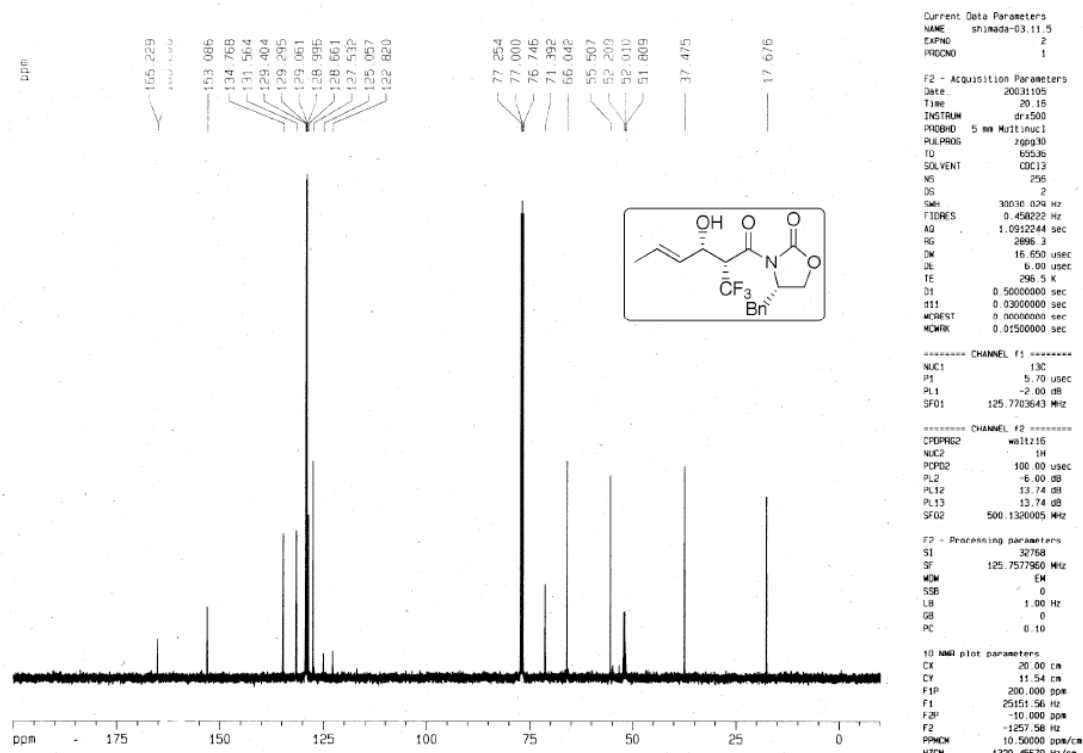

**anti-(2S,3S) (1h)**

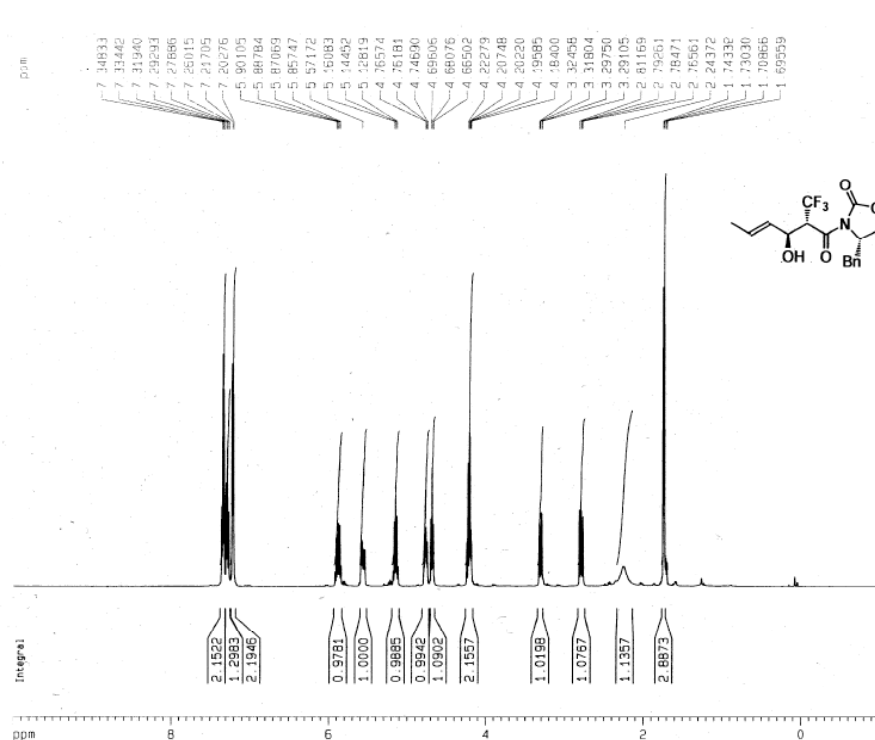

Current Data Parameters  
NAME yoshioka-04.6.9  
EXPNO 1  
PROCNO 1

F2 - Acquisition Parameters  
Date\_ 20040609  
Time 15.36  
INSTRUM drx500  
PROBHD 5 mm Multinucl  
PULPROG zg30  
TD 65536  
SOLVENT CDCl3  
NS 16  
DS 2  
SWH 10330.578 Hz  
FIDRES 0.357635 Hz  
AQ 3.1719923 sec  
RG 128  
DM 48.400 usec  
DE 6.00 usec  
TE 297.1 K  
D1 1.00000000 sec  
MCREST 0.00000000 sec  
MCWPR 0.01500000 sec

----- CHANNEL f1 -----  
NUC1 1H  
P1 10.30 usec  
PL1 -6.00 dB  
SFO1 500.1330685 MHz

F2 - Processing parameters  
SI 32768  
SF 500.1330131 MHz  
WDW EM  
SSB 0  
LB 0.30 Hz  
GB 0  
PC 1.00

1D NMR plot parameters  
CX 20.00 cm  
CY 7.10 cm  
F1P 10.000 ppm  
F1 5001.30 Hz  
F2P -1.000 ppm  
F2 -500.13 Hz  
PPMCM 0.55000 ppm/cm  
HZCM 275.07150 Hz/cm

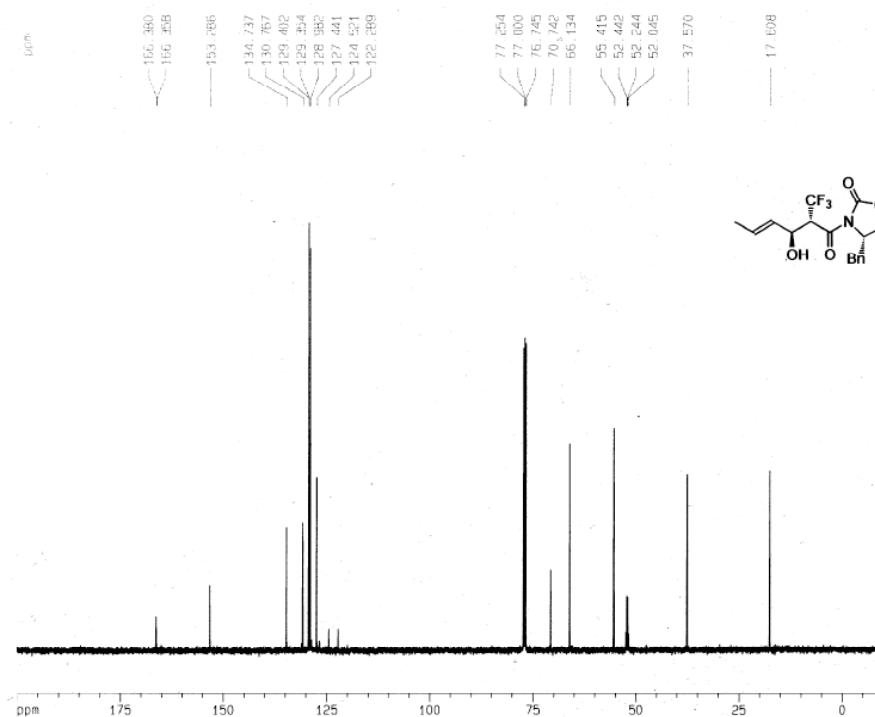

Current Data Parameters  
NAME yoshioka-04.6.9  
EXPNO 2  
PROCNO 1

F2 - Acquisition Parameters  
Date\_ 20040609  
Time 15.45  
INSTRUM drx500  
PROBHD 5 mm Multinucl  
PULPROG zgpg30  
TD 65536  
SOLVENT CDCl3  
NS 256  
DS 2  
SWH 30030.029 Hz  
FIDRES 0.458222 Hz  
AQ 1.0912244 sec  
RG 3649.1  
DM 16.650 usec  
DE 6.00 usec  
TE 298.2 K  
D1 0.50000000 sec  
D11 0.03000000 sec  
MCREST 0.00000000 sec  
MCWPR 0.01500000 sec

----- CHANNEL f1 -----  
NUC1 13C  
P1 5.70 usec  
PL1 -2.00 dB  
SFO1 125.7703643 MHz

----- CHANNEL f2 -----  
CPDPRG2 waltz16  
NUC2 1H  
PCPD2 100.00 usec  
PL2 -6.00 dB  
PL12 13.74 dB  
PL13 13.74 dB  
SFO2 500.1330685 MHz

F2 - Processing parameters  
SI 32768  
SF 125.7577960 MHz  
WDW EM  
SSB 0  
LB 1.00 Hz  
GB 0  
PC 1.40

1D NMR plot parameters  
CX 20.00 cm  
CY 9.32 cm  
F1P 200.000 ppm  
F1 25151.56 Hz  
F2P -10.000 ppm  
F2 -125.76 Hz  
PPMCM 10.50000 ppm/cm  
HZCM 1320.45679 Hz/cm

#### IV. ORTEP drawing

non-Evans *syn* (**1a**)

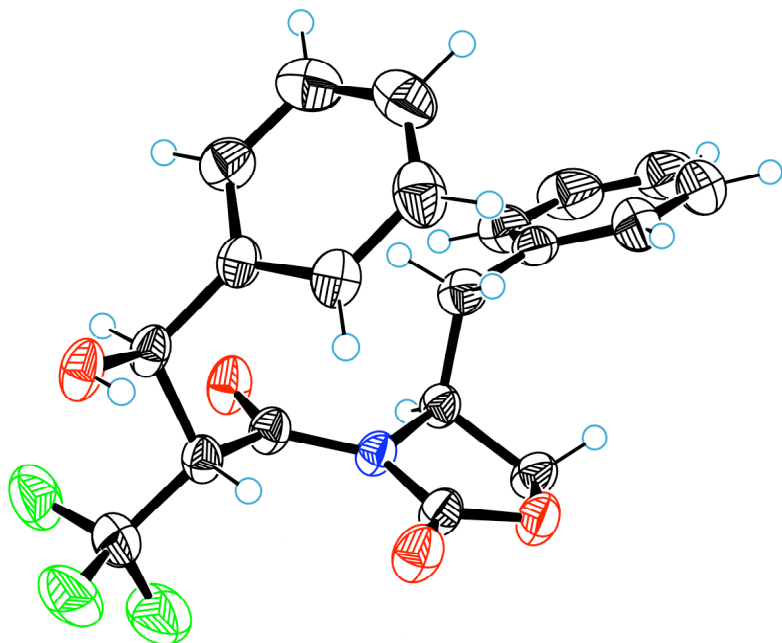

Evans *anti* (**1c**)

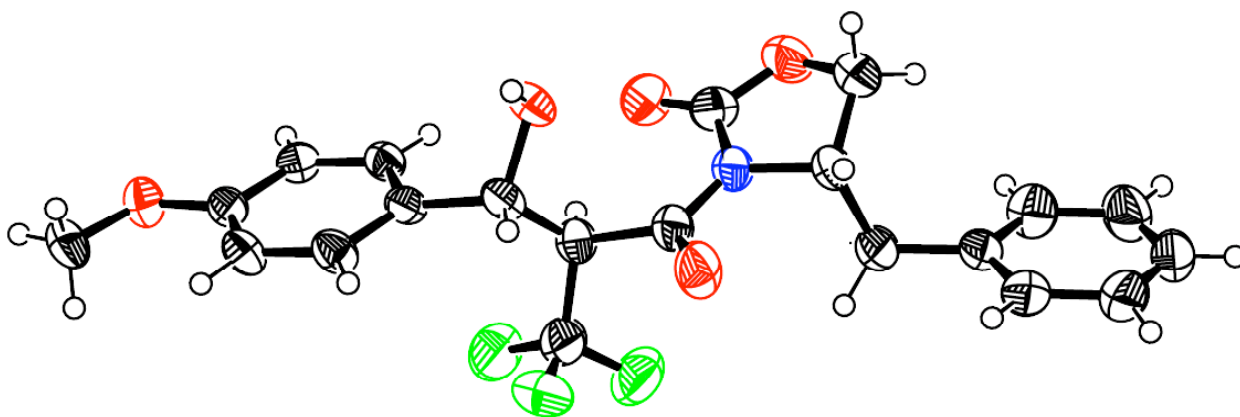

Supplement: Supplementary file 1 [file 5067109]
